# Supplementary material for: Measuring ability to assess claims about treatment effects: the development of the ‘Claim Evaluation Tools’
Source: PubMed Central journal article supplement — BMJ Open. 2017 May 17;7(5):e013184. doi: 10.1136/bmjopen-2016-013184 (PMC5777467; doi:10.1136/bmjopen-2016-013184), 2017-05-17
Supplement: bmjopen-2016-013184.draft_revisions.pdf [file bmjopen-2016-013184.draft_revisions.pdf]

# BMJ Open

## Measuring ability to assess claims about treatment effects: The development of the "Claim Evaluation Tools"

|                                 |                                                                                                                                                                                                                                                                                                                                                                                                                                                                 |
|---------------------------------|-----------------------------------------------------------------------------------------------------------------------------------------------------------------------------------------------------------------------------------------------------------------------------------------------------------------------------------------------------------------------------------------------------------------------------------------------------------------|
| Journal:                        | <i>BMJ Open</i>                                                                                                                                                                                                                                                                                                                                                                                                                                                 |
| Manuscript ID                   | bmjopen-2016-013184                                                                                                                                                                                                                                                                                                                                                                                                                                             |
| Article Type:                   | Research                                                                                                                                                                                                                                                                                                                                                                                                                                                        |
| Date Submitted by the Author:   | 06-Jul-2016                                                                                                                                                                                                                                                                                                                                                                                                                                                     |
| Complete List of Authors:       | Austvoll-Dahlgren, Astrid; Norwegian Institute Of Public Health, Semakula, Daniel; Makerere University College of Health Sciences, Nsangi, Allen; Makerere University College of Health Sciences, School of Medicine<br>Oxman, Andrew; Norwegian Health Services Research Centre<br>Chalmers, Iain; James Lind Initiative<br>Rosenbaum, Sarah; Nasjonalt folkehelseinstitutt<br>Guttersrud, Øystein; Norwegian Centre for Science Education, University of Oslo |
| <b>Primary Subject Heading</b>: | Patient-centred medicine                                                                                                                                                                                                                                                                                                                                                                                                                                        |
| Secondary Subject Heading:      | Research methods, Health policy, Public health                                                                                                                                                                                                                                                                                                                                                                                                                  |
| Keywords:                       | evidence based medicine, hared decision making, health literacy, outcome measurement, multiple-choice, patient education                                                                                                                                                                                                                                                                                                                                        |
|                                 |                                                                                                                                                                                                                                                                                                                                                                                                                                                                 |

SCHOLARONE™  
Manuscripts

Only

## Measuring ability to assess claims about treatment effects: The development of the “Claim Evaluation Tools”

Astrid Austvoll-Dahlgren, Daniel Semakula, Allen Nsangi, Andy Oxman, Iain Chalmers, Sarah Rosenbaum, Øystein Guttersrud, The IHC group\*

Leila Cusack

Claire Glenton

Tammy Hoffmann

Margaret Kaseje

Simon Lewin

Leah Atieno Marende

Angela Morrelli

Michael Mugisha

Laetitia Nyirazinyoye

Kjetil Olsen

Matthew Oxman

Nelson K. Sewamkambo

Anne Marie Uwitonze

Astrid Austvoll-Dahlgren (corresponding author)

[astrid.austvoll-dahlgren@fhi.no](mailto:astrid.austvoll-dahlgren@fhi.no)

+47 41294057

Norwegian Institute of Public Health

BOKS 7004 St.Olavsplass

0130 Oslo, Norway

Daniel Semakula

[semakuladaniel@gmail.com](mailto:semakuladaniel@gmail.com)

Makerere University College of Health Sciences.

New Mulago Hospital Complex, Administration Building, Second Floor.

P.O.Box 7072, Kampala Uganda

Allen Nsangi

[nsallen2000@yahoo.com](mailto:nsallen2000@yahoo.com)

Makerere University College of Health Sciences.

New Mulago Hospital Complex, Administration Building, Second Floor.

P.O.Box 7072, Kampala Uganda

Andrew D. Oxman

[oxman@online.no](mailto:oxman@online.no)

Norwegian Institute of Public Health

BOKS 7004 St.Olavsplass

0130 Oslo, Norway

Iain Chalmers

[ichalmers@jameslind.net](mailto:ichalmers@jameslind.net)

1  
2  
3  
4  
5  
6  
7  
8  
9  
10  
11  
12  
13  
14  
15  
16  
17  
18  
19  
20  
21  
22  
23  
24  
25  
26  
27  
28  
29  
30  
31  
32  
33  
34  
35  
36  
37  
38  
39  
40  
41  
42  
43  
44  
45  
46  
47  
48  
49  
50  
51  
52  
53  
54  
55  
56  
57  
58  
59  
60

Iain Chalmers  
Coordinator, James Lind Initiative  
Summertown Pavilion  
Middle Way  
Oxford OX2 7LG, UK

Sarah Rosenbaum  
[Sarah.rosenbaum@fhi.no](mailto:Sarah.rosenbaum@fhi.no)  
Norwegian Institute of Public Health  
BOKS 7004 St.Olavsplass  
0130 Oslo, Norway

Øystein Guttersrud  
[oystein.guttersrud@naturfagsenteret.no](mailto:oystein.guttersrud@naturfagsenteret.no)  
Norwegian Centre for Science Education, University of Oslo  
Postboks 1106, Blindern 0317 Oslo, Norway

**Keywords: evidence based medicine, shared decision making, health literacy, outcome measurement, multiple-choice, patient education**

## Abstract

**Objectives:** To describe the development of the Claim Evaluation Tools, a battery of multiple-choice items, to measure people's ability to understand and apply Key Concepts needed to assess claims about treatment effects.

**Setting:** Methodologists and members of the community in Uganda, Rwanda, Kenya, Norway, United Kingdom and Australia.

**Participants:** We used purposeful sampling of people with expertise in the Key Concepts, as well as patients and members of the public from both low and high-income countries in the iterative development of the items. This included four processes: (1) determining the scope of the Claim Evaluation Tools and development of items; (2) expert item review and feedback (n=63); (3) cognitive interviews with children and adult end-users (n=109); and (4) piloting and administrative tests (n=956).

**Results:** The Claim Evaluation Tools currently consists of between four and six multiple-choice items addressing each of the Key Concepts. Each item begins with a scenario intended to be relevant across contexts, and which can be used for children (from 10 years old and above), adult members of the public as well as health professionals. Methodologists and people with expertise in the Key Concepts judged the items to have face validity, and end-users judged them relevant and acceptable in their settings. In response to feedback from methodologists and end-users, we simplified some text, explained terms where needed, and redesigned formats and instructions.

### Conclusion:

The Claim Evaluation Tools include a battery of objective and flexible multiple-choice items, from which researchers, teachers and others can select those that are relevant for specific purposes or populations. These evaluation tools are being managed and made freely available for non-commercial use (on request) through the website Testing Treatments interactive ([testingtreatments.org](http://testingtreatments.org)).

## Strengths and limitations of this study

- To our knowledge, this is the first attempt to develop a set of evaluation tools that objectively measure people's ability to apply Key Concepts people need to know to assess claims about treatment effects
- This development was led by researchers in high and low income countries, including feedback from people with methodological expertise and members of the public
- Based on qualitative and quantitative feedback, the Claim Evaluation Tools were found to have face validity and relevant in the studied contexts
- There are many ways of developing evaluation instruments. We chose to use a pragmatic and iterative approach, but the reliability of the items remains to be tested.

For peer review only

## Background

There are endless claims about treatments in the mass media, advertisements and everyday personal communication (1-4). Such claims may include strategies to prevent illness, such as changes in health behaviour or screening: therapeutic interventions; or public health and system interventions. Many claims are unsubstantiated, and many patients and professionals alike may neither know whether the claims are true or false, nor have the necessary skills or tools to assess their reliability (5-11). As a result, people who believe and act on unvalidated claims may suffer by doing things that can be harmful, and by not doing things that can help. Either way, personal and societal resources for health care will be wasted (12).

The Informed Healthcare Choices (IHC) project aims to support the use of research evidence by patients and the public, policymakers, journalists and health professionals. The multidisciplinary group responsible for the project includes researchers in six countries - Norway, Uganda, Kenya, Rwanda, United Kingdom and Australia. The project is funded by the Research Council of Norway and has been responsible for developing and evaluating resources for two strategies to improve people's ability to assess claims about treatment effects. The first strategy involves the use of resources in primary schools to improve children's ability to assess claims about treatment effects. The second strategy uses podcasts to improve the ability of parents of primary school children to assess claims about treatment effects. We have piloted these resources in Uganda, Kenya, Rwanda and Norway, and the effects of the resources will be tested in randomized trials in Uganda (13, 14).

The IHC project group began by developing a list of Key Concepts that people need to understand to assess claims about treatment effects (15). This was done by using the second edition of the book "Testing Treatments" as our starting point, and by doing a literature review to identify Key Concepts and a review of critical appraisal tools for the public, journalists and health professionals (11, 15). The list of Key Concepts (Table 1) which emerged from this process was revised iteratively based on feedback from members of the project team and the IHC advisory group. The latter includes researchers, journalists, teachers and others with expertise in health literacy, and in teaching or communicating evidence-based health care (15). The resulting list of Key Concepts is an evolving document hosted by

1  
2  
3 testingtreatments.org, and is reviewed annually to allow for revisions of existing concepts or  
4 identification and inclusion of additional concepts.  
5  
6  
7

8  
9 *Please enter Table 1. The Key Concepts*

10  
11  
12 A systematic mapping review conducted as part of the IHC project concluded that the list of Key  
13 Concepts has wide interdisciplinary relevance, including in research areas such as use of decision  
14 support tools, training in evidence-based healthcare and critical appraisal, promotion of informed  
15 consent through improving understanding of trial methods, and school science education (16). Although,  
16 the common goal of these research fields is to facilitate informed decision-making, the research is  
17 heterogeneous. Partly overlapping and sometimes parallel research areas have been responsible for  
18 studies focusing on specific concepts, such as Key Concept 5.1 “weighing the benefits and harms of a  
19 treatment”, or the Key Concept 2.1 “Treatment comparisons are necessary” (16). Furthermore, we have  
20 not been able to identify any previous consensus or conceptualisation of Key Concepts critical to  
21 understanding the effects of treatments, nor have we found any instrument that measures  
22 understanding of all of the Key Concepts we have identified. Based on the findings of our systematic  
23 review, we concluded that the teaching resources we identified, and the procedures and instruments  
24 used to map or evaluate people’s understanding, covered only a handful of the Key Concepts (16).  
25  
26  
27  
28  
29  
30  
31  
32  
33  
34  
35

36 In summary, we agreed that there existed a need to develop measurement instruments to assess  
37 people’s understanding of the Key Concepts. Accordingly, we set out to develop the Claim Evaluation  
38 Tools to serve as the primary outcome measures for evaluating the effects of the IHC primary school  
39 resources and the IHC podcast series in randomised trials. Although our primary target groups were  
40 children and adults in Uganda, we wanted to create a set of tools that would also be relevant in other  
41 settings. Four important elements underpinned the development of the Claim Evaluation Tools. These  
42 tools should (i) objectively measure people’s ability to apply the Key Concepts; (ii) be flexible and easily  
43 adaptable to particular populations or purposes; (iii) be rigorously evaluated; and (iv) be freely available  
44 for non-commercial use by others interested in mapping or evaluating people’s ability to apply some or  
45 all of the Key Concepts.  
46  
47  
48  
49  
50  
51  
52  
53  
54

## 55 **Objective**

To describe the development of the Claim Evaluation Tools, a set of objective and flexible tools to measure people's ability to apply Key Concepts needed to assess claims about treatment effects.

## Methods

The development of the Claim Evaluation Tools included four processes, using qualitative and quantitative methods, over three years (2013-2016): (i) determining the scope of the Claim Evaluation Tools and development of items; (ii) expert item review and feedback (face validity); (iii) cognitive interviews with end-users - including children, parents, teachers and patient representatives - to achieve relevance, understanding and acceptability; and (iv) piloting and practical administrative tests of the items in different contexts. For clarity, the methods and findings of each of these processes are described separately. However, development was iterative, with the different processes overlapping and feeding into each other. Researchers affiliated with the ICH project in six countries (Uganda, Norway, Rwanda, Kenya, UK and Australia) contributed to the development of the Claim Evaluation Tools. An overview of the development process is presented in Figure 1. The roles and purposes of the different research teams are described below.

*Please enter Figure 1. Overview and timeline of the development process*

### **Determining the scope of the Claim Evaluation Tools and the development of items**

The Claim Evaluation Tools working group, with members of the IHC group from Norway, UK and Uganda (AA, AO, IC, DS, AN), had principal responsibility for agreeing on content, including the instructions and wording of individual items. The development and evaluations were coordinated by the team in Norway (AA and AO). The scope of the Claim Evaluation Tools was based on the list of Key Concepts (15)(see table 1).

Our vision for the Claim Evaluation Tools was that they should not be a standard fixed questionnaire, but rather a flexible tool including a battery of items, of which some may be more relevant to certain populations or purposes. Multiple-choice items are well suited for assessing application of knowledge, interpretation and judgements. In addition, they help problem-based learning and practical decision making (17). Each of the items we created opened with a scenario leading to a treatment claim and a question, which was followed by a choice of answers. We developed the items using two multiple-



1  
2  
3 choice formats - single multiple-choice items (addressing one concept), and multiple true-false items  
4 (addressing several concepts in the same item). We developed all items with “one-best answer”  
5 response options (17), the options being placed on a continuum, with one answer being unambiguously  
6 the “best” and the remaining options as “worse”. All items were developed in English.  
7  
8  
9

10  
11  
12 The initial target groups for the Claim Evaluation Tools were fifth grade children (10 to 12 year-olds in  
13 the next to last year of primary school) and adults (parents of primary school children) in Uganda.  
14 However, throughout the development process, our goal was to create a set of tools that would be  
15 relevant in other settings. Accordingly, we used conditions and treatments that we judged likely to be  
16 relevant across different country contexts. Where necessary, we explained the conditions and  
17 treatments used in the opening scenarios. We also decided to avoid conditions and treatments that  
18 might lead the respondents to focus on the specific treatments (about which they might have an opinion  
19 or prior knowledge), rather than on the concepts.  
20  
21  
22  
23  
24  
25  
26

### 27 **Exploring relevance, understanding and acceptability of items**

28  
29 In order to get feedback on the relevance, understanding and acceptability of items, we used purposeful  
30 sampling of people with expertise in the Key Concepts, as well as patients and members of the public  
31 from both low and high-income countries (18-21).  
32  
33  
34  
35

36 ***Item review and feedback by methodologists (face validity)*** First we circulated the complete set of  
37 multiple-choice items to members of the IHC advisory group and asked them to comment on their  
38 applicability and face validity as judged against the list of Key Concepts. Each advisory group member  
39 was assigned a set of three concepts, with associated items. A feedback form asked them to indicate to  
40 what extent they felt each item addressed the relevant Key Concept using the response options “Yes”,  
41 “No” or “Uncertain”, together with any open-ended comments. Any items that were tagged as “No” or  
42 “Uncertain” by one or more of those consulted were considered for revision.  
43  
44  
45  
46  
47  
48  
49

50 On two occasions, we also invited four methodologists associated with the Norwegian research group  
51 and with expertise in the concepts to respond to the full set of items. These experts were not involved in  
52 the project or the development of the Claim Evaluation Tools. In this element of the evaluation, the  
53 response options were randomised and the methodologists were blinded to the correct answers. They  
54  
55  
56  
57  
58  
59  
60

1  
2  
3 were asked to choose what they judged to be the best answer to each item's question, and were  
4 encouraged to provide open-ended comments and flag any problems they identified. Any item in which  
5 one or more of the methodologists failed to identify the 'best answer' was considered for potential  
6 revision.  
7  
8  
9

10  
11 We also invited people with expertise in the Key Concepts from all project partner countries to provide  
12 feedback on several occasions throughout the development of the tools. In addition to providing general  
13 feedback, an important purpose of reviewing the items in these different contexts was to identify any  
14 potential culturally inappropriate terminology and examples (conditions and treatments).  
15 For all of this feedback, suggested revisions and areas of improvement were summarised in an Excel  
16 worksheet in two categories: (i) comments of a general nature relating to all items, such as choice of  
17 terminology or format, and (ii) comments associated with specific items.  
18  
19  
20  
21  
22  
23  
24  
25

### ***Cognitive interviews with end-users on relevance of examples, understanding and acceptability***

26  
27 After the Claim Evaluation Tools working group and the IHC project group agreed on the instrument  
28 content, we undertook cognitive interviews with individuals from our potential target groups in Uganda,  
29 Australia, UK and Norway (22-24). Country representatives of the IHC project group recruited  
30 participants in their own contexts, based on purposeful sampling, in consultation with the Norwegian  
31 coordinator (AA). Since Uganda has been the principal focus of our interest, this was always our starting  
32 and ending point. In total, four rounds of interviews took place in Uganda. The interviews in Norway, UK  
33 and Australia were done to assess relevance within these settings.  
34  
35  
36  
37  
38  
39  
40

41 The overall objective of these interviews was to obtain feedback from potential end-users on the  
42 relevance of the scenarios (such as the conditions and treatments used as examples), and the  
43 intelligibility and acceptability of the scenarios, formats and instructions. This was particularly important  
44 because the items were to be used for children as well as adults. Throughout this process, we also  
45 piloted and user-tested several versions of the items (designs and instructions). Failure to address these  
46 issues when developing the items might increase the likelihood of missing responses, "guessing" or  
47 other measurement errors. For example, we wanted to minimise the influence of people's cultural  
48 background on how they responded to the multiple-choice items. The effects of such confounders are  
49 being addressed in the last phase of the development in the psychometric testing and Rasch analysis of  
50  
51  
52  
53  
54  
55  
56  
57  
58  
59  
60

1  
2  
3 the questionnaire (25). The interviews were intended to help prevent such problems relatively early in  
4 the evaluation process.  
5  
6  
7

8  
9 Interviews were performed iteratively between October 2014 and January 2016, allowing for changes to  
10 the items between interviews. All interviews were conducted using a semi-structured interview guide  
11 (Appendix 1) inspired by previous research (22-24). As part of the interviews, the participants were given  
12 a sample set of the multiple-choice items and asked to respond to these. The interviews addressed  
13 questions raised during development of the items about the format of questions or the terminology  
14 used in the questions. In response, the interview guide was revised and multiple-choice items changed  
15 when relevant.  
16  
17  
18  
19

20  
21  
22 When conducting the interviews, we used the methods of ‘think aloud’ and ‘verbal probing’, two  
23 approaches to cognitive interviewing (23). With “think aloud” the respondent is asked to explain how  
24 they arrived at their response to each item. Such interviews are less prone to bias because of the more  
25 limited role of the interviewer. However, some respondents have difficulty in verbalising their thought  
26 processes, and in these circumstances we followed up with “verbal probing”, which uses questions that  
27 the interviewer asks after the respondent has completed each of the items. Following each item the  
28 interviewer began with the “think aloud” method by asking respondents how they arrived at their  
29 response before asking more specific questions, as necessary.  
30  
31  
32  
33  
34  
35  
36  
37

38 We audio recorded interviews when possible, and we aimed to have two people doing the interviews  
39 (with one person taking notes and the other person being the lead-interviewer). For practical reasons  
40 this was not always possible. Each country representative summarised the key points from the  
41 interviews. Suggested revisions and areas of improvement were fed back to the Norwegian coordinator  
42 who entered these into the same Excel spreadsheet as the feedback from the methodologists.  
43  
44  
45  
46  
47

### 48 ***Piloting and administrative tests***

49  
50 We conducted five pilots of administering sets of the Claim Evaluation Tools to our target groups. The  
51 first pilot (March-April 2015) was an administrative test in a primary school in Uganda. This test was  
52 performed with a group of children who had taken part in a pilot of the IHC primary school resources as  
53 part of the IHC project, and with a comparison group who had not received training in the Key Concepts  
54  
55  
56  
57  
58  
59  
60

1  
2  
3 (in total 169 children). In this pilot, we administrated all items addressing 22 of the 32 Key Concepts (see  
4 Table 1). The reason for this cut-off was that these 22 concepts were targets of the intervention in the  
5 first draft of the IHC resources. Because of the large number of items to be tested, they were divided  
6 into four sets or questionnaires. These questionnaires were designed to be similar to the questionnaires  
7 to be used in the IHC trials, and would thus give us some feedback on how administrating a set of the  
8 Claim Evaluation Tools would work in practice, in a classroom setting. We also wanted to explore  
9 potential problems with incorrectly completed responses (through visual inspection of the responses).

10  
11  
12 The second pilot focused solely on format testing (September to December 2015). Three different sets  
13 of formats were tested. The formats were designed based on lessons learned from the feedback from  
14 the methodologists, interviews with end-users, and through visual inspection of the data collected in the  
15 first pilot. We recruited people in Uganda, Rwanda and Kenya to do this (N=204), using purposeful  
16 sampling, including children and adults. The same set of Claim Evaluation Tools was kept constant across  
17 the three formats. The outcome of this test was evaluated based on the number of missing or  
18 incorrectly completed responses per item.

19  
20  
21 The third pilot (October to November 2015) and fourth pilot (November to December 2015) were  
22 conducted with Ugandan primary school children (in two schools) and their parents. The final pilot  
23 (December 2015) took place in Norway and included primary school children in one school. In all of  
24 these three pilots, we recruited children and adults who had taken part in the piloting of IHC primary  
25 school materials and podcast, and children and adults who had received no such intervention. The first  
26 objective of these pilots was to compare the ability of people who had and had not received training to  
27 apply the Key Concepts. This provided an indication of the sample-sizes that would be needed for the  
28 IHC randomised trials. The second objective of the pilots was to estimate the frequency of missing  
29 responses as an indication of problems of understanding the item's instructions. For these purposes, we  
30 used only one set of the Claim Evaluation Tools (addressing the 22 basic concepts). The reason for this  
31 was that we needed to reduce the number of items to gain statistical power in these small samples. In  
32 total, 197 children took part in the Ugandan school pilot, 301 parents took part in the podcast pilot, and  
33 85 children took part in the Norwegian school pilot. The results of these pilots were summarised by  
34 calculating mean correct responses to all items addressing the same concept. We also calculated missing  
35 responses per item.

## Results

### Feedback from experts and members of the target groups

#### *Face validity, perceived relevance and fit to the target group*

We created 6 to 8 items per Key Concept, predicting that about half of these would be removed through feedback from experts, end-users and through the final psychometric testing and Rasch analysis (25).

Thirteen members of the IHC advisory group provided feedback on 135 items. Only one of these items was judged to have addressed the concept inadequately, and a further 20 items were deemed to be partly relevant. Feedback from the two blinded assessments of the Claim Evaluation Tools provided by the methodologists supported the items relevance to the Key Concepts.

Another important element of the feedback from the test-run with the methodologists was that the 'distance' between the "best" option and the "worse" options was considered too small, with the result that the items were too difficult. Based on this feedback, we revised the 'distractors' in the 'worse' options to make them more "wrong". The cognitive interviews with members of our target group also suggested that the items were too 'text heavy' and needed to be simplified. In relation to this, low-literacy skill was also raised as a potential barrier by experts and end-users in Uganda. Consequently, we tried hard to make the scenarios as simple as possible without losing key content.

The end-users and the methodologists consulted in each country (Uganda, Kenya, Rwanda, UK, and Australia), also provided comments on terminology, as well as on the examples used in the scenarios that they felt might not be appropriate or would need to be explained. The Claim Evaluation Tools working group considered these comments and revised the items. When we were unable to avoid using certain terms (for example, "research study"), we added explanations. Our rationale was that some terms would present a barrier to understanding the items, but were not considered to be part of the learning objectives associated with the Key Concepts. For some other terms, we used alternatives deemed acceptable by researchers, other experts and members of the target groups in each country (Uganda, Kenya, Rwanda, UK, Australia and Norway). This process involved feeding back all changes to experts and end-users in an iterative process with continuous revisions.

*Please enter Figure 2. Example of formats*

### ***Preference of format and missing responses***

Important objectives of the interviews with end-users were to obtain their preferences on format, to follow the steps of their reasoning when responding to the items and to assess their understanding of the items' instructions. The main message was that people preferred a mix of the simple-multiple choice and multiple true-false formats to make the questionnaire more interesting. The items were otherwise well-received. The general feedback from all the different country settings was that the formats were acceptable, recognisable and similar to multiple-choice formats they had encountered in other settings.

Based on verbal feedback, as well as visual inspection of how people responded to the items in the pilots, two potential ways were identified to prevent missing or incorrectly completed responses. The first was to avoid unnecessary open spaces in the items, because respondents tended to use these to write open-ended answers to the questions. The second was to avoid using check boxes, because respondents would check more than one check-box. These issues are easily dealt with when questionnaires are administered electronically, but are a problem in paper-administered questionnaires. Examples of incorrectly filled in multiple-choice questions are shown in Figure 3. The design changes used to avoid these problems are shown in Figure 2.

*Please enter Figure 3. Examples of incorrectly filled in multiple-choice questions*

### ***Pilots and administrative tests***

The first school pilot in Uganda (March- April 2015) revealed problems with instructions and formats that resulted in mean missing responses of 20-40% of the items. The revised designs (Figure 2) we tested in the second pilot in Uganda, Rwanda and Kenya (September to December 2015) greatly improved people's responses to the questionnaire, reducing missing or incorrectly completed responses to between <4% of items. Based on this pilot, we made final revisions and decided on the formats to be used in the subsequent pilots.

The third, fourth and fifth pilots conducted in Uganda and Norway (October to December 2015), confirmed the appropriateness of the formats, and missing or incorrectly completed responses were <2%. These pilots also confirmed that respondents took between 30 to 60 minutes to complete a

1  
2  
3 questionnaire that included demographic questions and a sample of 29 items. The participants' correct  
4 responses per Key Concept are shown in Figure 3. The participants who had taken part in piloting of the  
5 IHC resources did slightly better than others for most of the Key Concepts (see Figure 4).  
6  
7  
8

9  
10 *Please enter Figure 4. Distribution of correct answers in pilots*  
11

## 12 13 14 **Discussion**

15  
16 Developing a new evaluation instrument is not straightforward, and requires rigorous testing using  
17 qualitative and quantitative methods (26). There are many ways of doing this. We chose to use a  
18 pragmatic and iterative approach, involving feedback from experts and end-users and continuous  
19 revisions. This development work was made possible by a multidisciplinary, international collaboration  
20 including people from high and low-income countries. Despite differences between countries, enabling  
21 people to assess treatment claims in their daily lives is a challenge across all countries. Although the  
22 Claim Evaluation Tools have been developed as part of the IHC project, we believe that they will be  
23 useful tool for others interested in mapping or evaluation of people's ability to apply Key Concepts in  
24 assessing claims about treatment effects.  
25  
26  
27  
28  
29  
30  
31

32  
33 An international group of people with relevant expertise considered that the items we developed  
34 appropriately addressed the Key Concepts we had identified. The items were considered by end-users to  
35 be acceptable in the four settings in which we conducted interviews: Uganda, Norway, UK and Australia.  
36 Certain terms were identified as problematic, so we either simplified the terminology or added  
37 explanations. Based on lessons learned from interviews and pilots, we redesigned formats that had led  
38 to missing or incorrectly completed responses, with a resultant fall in the frequency of these problems  
39 to less than 2%. Rigorous psychometric testing including Rasch analysis is also part of the development  
40 of the Claim Evaluation Tools. This is described in a separate paper which provides information about  
41 the reliability of the tools, the difficulty of the items, and other properties of the items as described by  
42 the Rasch analysis (25).  
43  
44  
45  
46  
47  
48  
49

50  
51  
52 Feedback from methodologists and end-users indicated that some items were rather difficult and text-  
53 heavy. Literacy was also raised as a potential barrier. In response to these findings, we tried to shorten  
54 texts, to avoid unnecessarily difficult terminology, and to add explanations where necessary. This  
55  
56  
57  
58  
59  
60

1  
2  
3 emphasised the importance of measuring literacy skills when administrating the Claim Evaluation Tools  
4 in certain settings, as this might impact how well people perform on the items and act as a potential  
5 confounder.  
6  
7

8  
9  
10 Many of the instruments that have been developed to assess people's critical-appraisal skills have relied  
11 on self-report by respondents of their own abilities (subjective measurements). Typical examples are the  
12 many health literacy instruments, such as the European Health Literacy Survey (HLS-EU)(27) and  
13 instruments used to assess competence in evidence-based medicine (28). Self-assessed abilities can be  
14 difficult to interpret, and have been found to have a weak association with objectively measured  
15 knowledge and skills (29-31). It can also be argued that such instruments measure the confidence of  
16 respondents in their own ability rather than their knowledge or actual ability. Although improved  
17 confidence in one's own abilities may be a relevant and important effect of an intervention, our primary  
18 objective was to develop an instrument to measure objective knowledge and actual ability to apply the  
19 Key Concepts when confronted with claims about treatments effects.  
20  
21  
22  
23  
24  
25  
26  
27

## 28 29 **Conclusion**

30  
31 We developed the Claim Evaluation Tools to evaluate people's ability to assess claims about the effects  
32 of treatments. As far as we are aware, this is currently the only evaluation instrument designed to  
33 address all of the Key Concepts we believe people need to know to assess claims about treatment  
34 effects. This work is the result of a multidisciplinary, international collaboration including high and low-  
35 income countries. We have used a pragmatic and iterative approach, involving feedback from experts  
36 and end-users and continuous revisions. Although the Claim Evaluation Tools have been developed  
37 primarily to be used as part of the IHC project in Uganda, we believe they should be useful for others  
38 interested in evaluating people's ability to apply the Key Concepts. Feedback from experts and end-  
39 users in Uganda, Kenya, Rwanda, Norway, UK and Australia supports our hope that they will be found  
40 relevant in other contexts.  
41  
42  
43  
44  
45  
46  
47  
48

49  
50 The Claim Evaluation Tools is a flexible instrument including a battery of items from which researchers  
51 can select those relevant for specific populations or purposes. The Claim Evaluation Tools currently  
52 consist of four to six multiple-choice items addressing each of the concepts in the list of Key Concepts.  
53 However, we anticipated that the Claim Evaluation Tools will continue to evolve. Maintenance and  
54  
55  
56  
57



1  
2  
3 revision of the Claim Evaluation Tools will reflect changes in the list of Key Concepts, as well as additions  
4 or changes made on the basis of further feedback, pilot testing, cognitive interviews and Rasch analyses  
5 with different target groups and in different settings. The Claim Evaluation Tools will be hosted on the  
6 [Testing Treatments interactive](#) website and managed by the Claim Evaluation Tools working group. On  
7 request, all items are freely available for non-commercial use.  
8  
9  
10  
11  
12

### 13 14 15 **Authors' Contributions**

16  
17 AA, ØG, AO wrote the protocol and the IHC group provided comments on the protocol. AA coordinated  
18 all of the development and evaluation process with support from AO. AA, DS, AN, IC, AO and MO drafted  
19 the items with input from the IHC group. AA, IC and AO were responsible for revising the items  
20 iteratively based on the feedback received through the different processes. SR and AA were responsible  
21 for the format designs. AA and KO approached the IHC advisory group and other methodologists for  
22 feedback. AN, DS, LC, AA, MO, SR, TH and MK conducted the interviews with end-users. AN, DS, KO, LAM,  
23 MM, LAM, MK, NS, AMU and AA were involved in pilots and administrative tests in Uganda, Kenya,  
24 Rwanda and Norway respectively. AA analysed the data from the pilots. AA authored this manuscript  
25 with significant input from the rest of the IHC group.  
26  
27  
28  
29  
30  
31  
32  
33  
34

### 35 **Acknowledgements**

36 We are deeply grateful to all of the enthusiastic children, parents and teachers that contributed to this  
37 project. We would also like to thank the IHC advisory panel, and the other experts that provided their  
38 advice. In particular we would like to thank Sophie Robinson, Ruth Davis, Andrew Garratt, Chris Del Mar,  
39 Susan Munabi Babigumira, Jenny Moberg, Signe Agnes Flottorp, Simon Goudie, Esme Lynch and Gunn  
40 Vist.  
41  
42  
43  
44  
45  
46

### 47 **Funding and competing interests**

48 The IHC project is funded in part by the Research Council of Norway- GLOBVAC project 220603. The  
49 authors declare no conflicts of interests.  
50  
51  
52  
53

### 54 **Ethical approval**

Ethical approval was sought by the IHC project representatives in each country.

## Data sharing statement

All data are published as part of this study. All Claim Evaluation Tools are available upon request for non-commercial use.

## References

1. Lewis M, Orrock P, Myers S. Uncritical reverence in CM reporting: Assessing the scientific quality of Australian news media reports. *Health Sociology Review*. 2010;19(1):57-72.
2. Glenton C, Paulsen E, Oxman A. Portals to Wonderland? Health portals lead confusing information about the effects of health care. *BMC Medical Informatics and Decision Making*. 2005;5:7:8.
3. Moynihan R, Bero L, Ross-Degnan D, Henry D, Lee K, Watkins J, et al. Coverage by the news media of the benefits and risks of medications. *The New England Journal of Medicine*. 2000;342(22):1645-50.
4. Wolfe R, Sharp L, Lipsky M. Content and design attributes of antivaccination web sites. *Journal of American Medical Association*. 2002;287(24):3245-48.
5. Woloshin S, Schwartz L, Byram S, Sox H, Fischhoff B, Welch H. Women's understanding of the mammography screening debate. *Archives of Internal Medicine* 2000;160:1434-40.
6. Fox S, Duggan M. Health Online 2013 09.04.2013. Available from: <http://www.pewinternet.org/Reports/2013/Health-online.aspx>.
7. Robinson E, Kerr C, Stevens A, Lilford R, Braunholtz D, Edwards S, et al. Lay public's understanding of equipoise and randomisation in randomised controlled trials. Research Support, Non-U.S. Gov't. NHS R&D HTA Programme, 2005 Mar. Report No.: 1366-5278 (Linking) Contract No.: 8.
8. Silience E, Briggs P, Harris PR, Fishwick L. How do patients evaluate and make use of online health information? *Social Science & Medicine*. 2007;64(9):1853-62.
9. Horsley T, Hyde C, Santesso N, Parkes J, Milne R, Stewart R. Teaching critical appraisal skills in healthcare settings. *Cochrane Database of Systematic Reviews*. 2011(11).
10. Stacey D, Bennett CL, Barry MJ, Col NF, Eden KB, Holmes-Rovner M, et al. Decision aids for people facing health treatment or screening decisions. *Cochrane Database of Systematic Reviews*. 2011(10).
11. Evans I, Thornton H, Chalmers I, P. G. *Testing Treatments: better research for better healthcare*. Second edition. London: Pinter & Martin Ltd 2011. Available from: Available online at [www.testingtreatments.org/new-edition/](http://www.testingtreatments.org/new-edition/).
12. Chalmers I., Glasziou P., Badenoch D., Atkinson P., Austvoll-Dahlgren A., Oxman A. Evidence Live 2016: Promoting informed healthcare choices by helping people assess treatment claims. *BMJ*; 26.06.2016.
13. Nsangi A., Semakula D., Oxman M., Austvoll-Dahlgren A., Rosenbaum S., Kaseje M., et al. Evaluation of resources to teach children in low income countries to assess claims about treatment effects. Protocol for a randomized trial. Submitted manuscript. 2016.
14. Semakula D., Nsangi A., Oxman M., Austvoll-Dahlgren A., Rosenbaum S., Kaseje M., et al. Can an educational podcast improve the ability of parents of primary school children to assess claims about the benefits and harms of treatments? Protocol for a randomized trial

Submitted manuscript. 2016.

15. Austvoll-Dahlgren A, Oxman AD, Chalmers I, Nsangi A, Glenton C, Lewin S, et al. Key concepts that people need to understand to assess claims about treatment effects. *Journal of Evidence-Based Medicine*. 2015;8(3):112-25.
16. Austvoll-Dahlgren A, Nsangi A, Semakula D. Key concepts people need to understand to assess claims about treatment effects: a systematic mapping review of interventions and evaluation tools. Submitted paper. 2016.
17. Case SC, DB S. *Constructing Written Test Questions For the Basic and Clinical Sciences* (Third edition). Philadelphia, USA: 2002.
18. Williamson PR, Altman DG, Blazeby JM, Clarke M, Devane D, Gargon E, et al. Developing core outcome sets for clinical trials: issues to consider. *Trials*. 2012;13.
19. Cooney RM, Warren BF, Altman DG, Abreu MT, Travis SPL. Outcome measurement in clinical trials for Ulcerative Colitis: towards standardisation. *Trials*. 2007;8.
20. Tugwell P, Boers M, Brooks P, Simon L, Strand V, Idzerda L. OMERACT: An international initiative to improve outcome measurement in rheumatology. *Trials*. 2007;8.
21. Basch E, Aronson N, Berg A, Flum D, Gabriel S, Goodman S, et al. Methodological Standards and Patient-Centeredness in Comparative Effectiveness Research The PCORI Perspective. *Journal of the American Medical Association*. 2012;307(15):1636-40.
22. Watt T, Rasmussen AK, Groenvold M, Bjorner JB, Watt SH, Bonnema SJ, et al. Improving a newly developed patient-reported outcome for thyroid patients, using cognitive interviewing. *Qual Life Res*. 2008;17(7):1009-17.
23. McColl E, Meadows K, Barofsky I. Cognitive aspects of survey methodology and quality of life assessment. *Qual Life Res*. 2003;12(3):217-8.
24. Bloem EF, van Zuuren FJ, Koenenman MA, Rapkin BD, Visser MR, Koning CC, et al. Clarifying quality of life assessment: do theoretical models capture the underlying cognitive processes? *Qual Life Res*. 2008;17(8):1093-102.
25. Austvoll-Dahlgren A, Gutterusrud G, Nsangi A, Semakula D, Oxman A, group. TI. Measuring ability to assess claims about treatment effects: A latent trait analysis of the "Claim Evaluation Tools" using Rasch modelling. Submitted paper. 2016.
26. Mokkink LB, Terwee CB, Patrick DL, Alonso J, Stratford PW, Knol DL, et al. The COSMIN checklist for assessing the methodological quality of studies on measurement properties of health status measurement instruments: an international Delphi study. *Qual Life Res*. 2010;19(4):539-49.
27. Sorensen K, Pelikan JM, Rothlin F, Ganahl K, Slonska Z, Doyle G, et al. Health literacy in Europe: comparative results of the European health literacy survey (HLS-EU). *Eur J Public Health*. 2015;25(6):1053-8.
28. Shaneyfelt T, Baum KD, Bell D, Feldstein D, Houston TK, Kaatz S, et al. Instruments for evaluating education in evidence-based practice: a systematic review. *JAMA*. 2006;296(9):1116-27.
29. Dahm P, Poolman RW, Bhandari M, Fesperman SF, Baum J, Kosiak B, et al. Perceptions and competence in evidence-based medicine: a survey of the American Urological Association Membership. *J Urol*. 2009;181(2):767-77.
30. Khan KS, Awonuga AO, Dwarakanath LS, Taylor R. Assessments in evidence-based medicine workshops: loose connection between perception of knowledge and its objective assessment. *Med Teach*. 2001;23(1):92-4.
31. Joffe S, Cook EF, Cleary PD, Clark JW, Weeks JC. Quality of informed consent in cancer clinical trials: a cross-sectional survey. *Lancet*. 2001;358(9295):1772-7.

1  
2  
3  
4  
5  
6  
7  
8  
9  
10  
11  
12  
13  
14  
15  
16  
17  
18  
19  
20  
21  
22  
23  
24  
25  
26  
27  
28  
29  
30  
31  
32  
33  
34  
35  
36  
37  
38  
39  
40  
41  
42  
43  
44  
45  
46  
47  
48  
49  
50  
51  
52  
53  
54  
55  
56  
57  
58  
59  
60

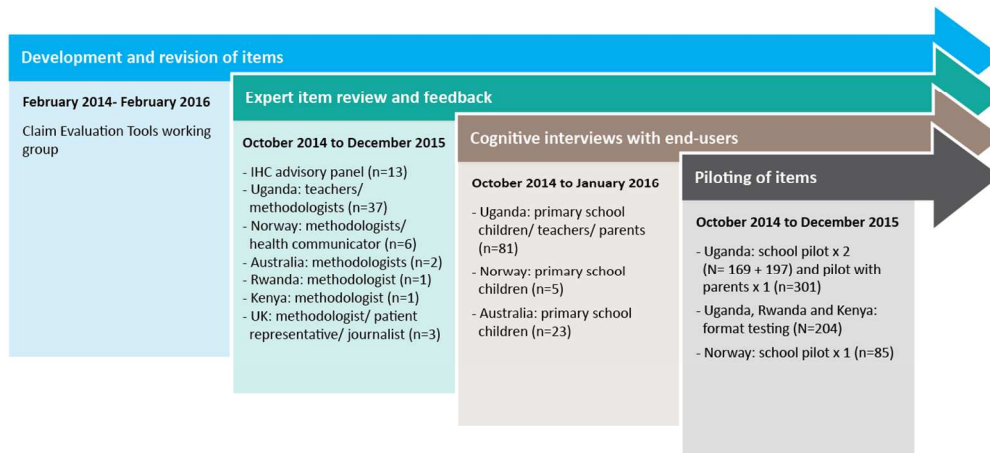

Peer review only

## Concept 1.3

Judith wants smoother skin. The younger girls in her school have smoother skin than the older girls. Judith thinks this is because the younger girls use cream on their skin to make the skin smoother.

**Question:** Based on this link between using cream and smooth skin, is Judith correct?

**Options:**

- A) It is not possible to say. It depends on how many younger and older girls there are
- B) It is not possible to say. There might be other differences between the younger and older girls
- C) Yes, because the younger girls use cream on their skin and they have smoother skin
- D) No, Judith should try using the cream herself to see if it works for her

**Answer:**

|          |                                                                                                                                                                                                                            |              |                 |
|----------|----------------------------------------------------------------------------------------------------------------------------------------------------------------------------------------------------------------------------|--------------|-----------------|
| Concepts | When you are sick, sometimes people say that something - a <u>treatment</u> - is good for you. It is hard to know whether what they say is true.<br><b>Do you agree or disagree with each of the following statements?</b> |              |                 |
|          | <i>For each statement below, use ✓ to mark whether you agree or disagree.</i>                                                                                                                                              |              |                 |
|          | <b>Statements:</b>                                                                                                                                                                                                         | <b>Agree</b> | <b>Disagree</b> |
| 1.1      | James says that a treatment cannot be helpful and harmful at the same time                                                                                                                                                 |              |                 |
| 1.2      | Peter says that if a treatment works for one person, the treatment will help others too                                                                                                                                    |              |                 |
| 1.3      | Alice says that if some people try the treatment and feel better, this means that the treatment helps                                                                                                                      |              |                 |

**Figure 2. Examples of formats: a simple multiple-choice item and a multiple true-false item**

George has a stomachache. The last time George had a stomachache was two months ago. That time, he drank some hot milk and after an hour, his stomachache was gone. Therefore, George says hot milk cures stomachaches.

## QUESTION:

Is George right?

PLEASE CIRCLE THE ANSWER THAT YOU THINK IS THE BEST

- 11  No
- 12
- 13 A. No, it is only based on George's own experience  
treating a stomachache with hot milk.
- 14
- 15 B. Not possible to say, the fact that he improved could  
16 have happened by chance No
- 17 C. Yes, George's own experience is evidence enough for  
18 assessing the effects of hot milk for treating a stomachache Yes
- 19 D. No, it is important to ask what other people think too,  
20 not just George No
- 21 Yes

22

23 Outside the city where Paul lives, there is a mine. The  
24 miners often get coughs. For many years, most of the  
25 miners have used whiskey mixed in water to reduce the  
26 pain from their coughs. Therefore, Paul says that water with  
27 a little whiskey is an effective and harmless treatment for a  
28 cough, since many people have used it for a long time.

## QUESTION:

Do you agree with Paul?

PLEASE CIRCLE THE ANSWER THAT YOU THINK IS THE BEST

- 31  No
- 32
- 33 A. No, just because whiskey mixed in water has been  
34 used by many, does not mean that it is harmless
- 35 B. No, just because whiskey mixed in water have been  
36 (used a lot), does not mean that it is the best treatment
- 37 C. Yes, the miners have used whiskey mixed in water to  
38 treat their coughs for many years and they would not use  
39 the treatment for many years if it were not beneficial and  
40 harmless
- 41 D. Not possible to say, Paul should try whiskey mixed in  
42 water on himself to know for sure that he is correct

43 Andrew has difficulty breathing. He goes to the shop to buy medicine. The shopkeeper  
44 gives Andrew tablet and says it will help improve his breathing. Andrew thinks if taking  
45 one tablet will help him, then taking two tablets will help him even more. Should Andrew  
46 take one or two tablets? Mark an X in the box for the best answer (only one)

- 47  One. Taking two is likely to be harmful and more expensive
- 48  One. Taking more than one will not necessarily be more helpful and may be harmful
- 49  One. Andrew should listen to the shopkeeper's advice
- 50
- 51  Two. Taking more than one will probably help him get better more quickly and is  
52 unlikely to be harmful
- 53

54 **Figure 3. Examples of incorrectly filled in multiple-choice questions**

55

56

57

58

59

60

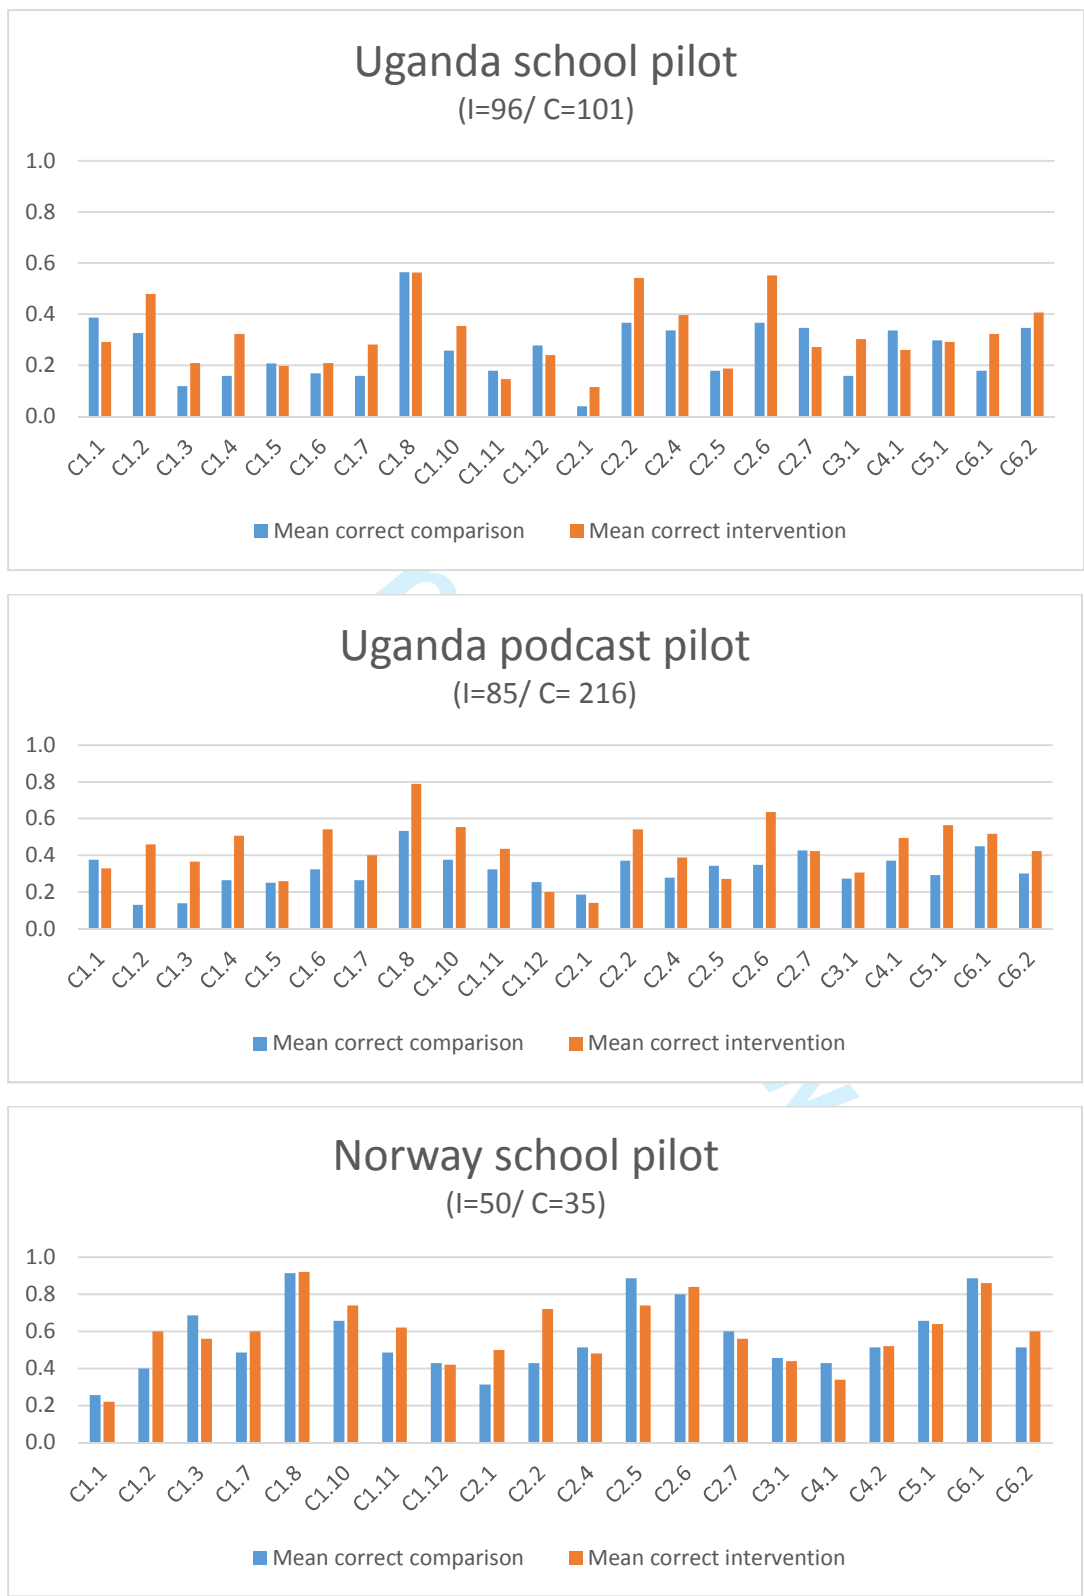

Figure 4. Distribution of correct answers per concept in three pilots

| Key Concepts included in IHC intervention pilots | Informed Healthcare Choices Concepts                                                                                                                                             |
|--------------------------------------------------|----------------------------------------------------------------------------------------------------------------------------------------------------------------------------------|
|                                                  | 1. Recognising the need for fair comparisons of treatments<br><i>[Fair treatment comparisons are needed]</i>                                                                     |
| x                                                | 1.1 Treatments may be harmful<br><i>[Treatments can harm]</i>                                                                                                                    |
| x                                                | 1.2 Personal experiences or anecdotes (stories) are an unreliable basis for determining the effects of most treatments<br><i>[Anecdotes are not reliable evidence]</i>           |
| x                                                | 1.3 A treatment outcome may be associated with a treatment, but not caused by the treatment<br><i>[Association is not necessarily causation]</i>                                 |
| x                                                | 1.4 Widely used or traditional treatments are not necessarily beneficial or safe<br><i>[Practice is often not based on evidence]</i>                                             |
| x                                                | 1.5 New, brand-named, or more expensive treatments may not be better than available alternatives<br><i>[New treatments are not always better]</i>                                |
| x                                                | 1.6 Opinions of experts or authorities do not alone provide a reliable basis for deciding on the benefits and harms of treatments<br><i>[Expert opinion is not always right]</i> |
| x                                                | 1.7 Conflicting interests may result in misleading claims about the effects of treatments<br><i>[Be aware of conflicts of interest]</i>                                          |
| x                                                | 1.8 Increasing the amount of a treatment does not necessarily increase the benefits of a treatment and may cause harm<br><i>[More is not necessarily better]</i>                 |
|                                                  | 1.9 Earlier detection of disease is not necessarily better<br><i>[Earlier is not necessarily better]</i>                                                                         |
| x                                                | 1.10 Hope can lead to unrealistic expectations about the effects of treatments<br><i>[Avoid unrealistic expectations]</i>                                                        |
| x                                                | 1.11 Beliefs about how treatments work are not reliable predictors of the actual effects of treatments<br><i>[Theories about treatment can be wrong]</i>                         |
| x                                                | 1.12 Large, dramatic effects of treatments are rare<br><i>[Dramatic treatment effects are rare]</i>                                                                              |
|                                                  |                                                                                                                                                                                  |



|   |                                                                                                                                                                                                      |
|---|------------------------------------------------------------------------------------------------------------------------------------------------------------------------------------------------------|
|   | 2. Judging whether a comparison of treatments is a fair comparison<br><i>[Treatment comparisons should be fair]</i>                                                                                  |
| x | 2.1 Evaluating the effects of treatments requires appropriate comparisons<br><i>[Treatment comparisons are necessary]</i>                                                                            |
| x | 2.2 Apart from the treatments being compared, the comparison groups need to be similar (i.e. 'like needs to be compared with like')<br><i>[Compare like with like]</i>                               |
|   | 2.3 People's experiences should be counted in the group to which they were allocated<br><i>[Base analyses on allocated treatment]</i>                                                                |
| x | 2.4 People in the groups being compared need to be cared for similarly (apart from the treatments being compared)<br><i>[Treat comparison groups similarly]</i>                                      |
| x | 2.5 If possible, people should not know which of the treatments being compared they are receiving<br><i>[Blind participants to their treatments]</i>                                                 |
| x | 2.6 Outcomes should be measured in the same way (fairly) in the treatment groups being compared<br><i>[Assess outcome measures fairly]</i>                                                           |
| x | 2.7 It is important to measure outcomes in everyone who was included in the treatment comparison groups<br><i>[Follow up everyone included]</i>                                                      |
|   |                                                                                                                                                                                                      |
|   | 3. Understanding the role of chance<br><i>[Understand the role of chance]</i>                                                                                                                        |
| x | 3.1 Small studies in which few outcome events occur are usually not informative and the results may be misleading<br><i>[Small studies may be misleading]</i>                                        |
|   | 3.2 The use of p-values to indicate the probability of something having occurred by chance may be misleading; confidence intervals are more informative<br><i>[P-values alone can be misleading]</i> |
|   | 3.3 Saying that a difference is statistically significant or that it is not statistically significant can be misleading<br><i>['Significance' may be misleading]</i>                                 |
|   |                                                                                                                                                                                                      |
|   | 4. Considering all of the relevant fair comparisons<br><i>[Consider all the relevant evidence]</i>                                                                                                   |
| x | 4.1 The results of single tests of treatments can be misleading<br><i>[Single studies can be misleading]</i>                                                                                         |

|   |                                                                                                                                                                                                                       |
|---|-----------------------------------------------------------------------------------------------------------------------------------------------------------------------------------------------------------------------|
|   | 4.2 Reviews of treatment tests that do not use systematic methods can be misleading<br><i>[Unsystematic reviews can mislead]</i>                                                                                      |
|   | 4.3 Well done systematic reviews often reveal a lack of relevant evidence, but they provide the best basis for making judgements about the certainty of the evidence<br><i>[Consider how certain the evidence is]</i> |
|   |                                                                                                                                                                                                                       |
|   | 5. Understanding the results of fair comparisons of treatments<br><i>[Understand the results of comparisons]</i>                                                                                                      |
| x | 5.1 Treatments may have beneficial and harmful effects<br><i>[Weigh benefits and harms of treatment]</i>                                                                                                              |
|   | 5.2 Relative effects of treatments alone can be misleading<br><i>[Relative effects can be misleading]</i>                                                                                                             |
|   | 5.3 Average differences between treatments can be misleading<br><i>[Average differences can be misleading]</i>                                                                                                        |
|   |                                                                                                                                                                                                                       |
|   | 6. Judging whether fair comparisons of treatments are relevant<br><i>[Judge relevance of fair comparisons]</i>                                                                                                        |
| x | 6.1 Fair comparisons of treatments should measure outcomes that are important<br><i>[Outcomes studied may not be relevant]</i>                                                                                        |
| x | 6.2 Fair comparisons of treatments in animals or highly selected groups of people may not be relevant<br><i>[People studied may not be relevant]</i>                                                                  |
|   | 6.3 The treatments evaluated in fair comparisons may not be relevant or applicable<br><i>[Treatments used may not be relevant]</i>                                                                                    |
|   | 6.4 Results for a selected group of people within fair comparisons can be misleading<br><i>[Beware of subgroup analyses]</i>                                                                                          |

Table 1. Short list of key concepts people need to understand to assess claims about treatment effects

## Example interview guide version 1

1. Introductions and information about purpose  
(The purpose of the interview is not to evaluate how participants perform on the questions, but to get feedback on the questions, i.e. comprehension and relevance)
2. Steps of reasoning (per item)
  - What was your response?
  - Can you tell me why you choose this response category? (steps of reasoning)
3. Relevance (per item)
  - What did you think of the scenario?
    - Probe:
      - Names
      - Treatment
      - Outcome
      - Other comments

## Example interview guide version 2

### Content and format of CLAIM

1. Introductions and information about purpose  
(The purpose of the interview is not to evaluate how participants perform on the questions, but to get feedback on the questions, i.e. comprehension and relevance)
  
4. Tell me about the test, what did you think about it?
  - First impression?
  - Similarities to other tests or exams?
  - Like/ doesn't like these differences?
  
5. What did you think about the instructions?
  - The test include different formats (show examples of SMC's and MMC's), what did you think of them?
  - The test also included some questions about behavior and attitudes, what did you think of them?
  - Do you think these questions fit your age group?
  - Was there any information you felt was missing?
  
6. What about the content of the test, was it easy or not easy for you to answer the questions?
  - What made it easy or not easy?
  - Were there any words you did not understand or otherwise reacted to?

### Literacy / understanding of CLAIM questions

7. Ask the respondent to read question 3 (concept 1.2) and question 14 (concept 2.2) from the CLAIM questionnaire that was used.
  - Was it easy or hard to understand that question?
  - What words were hard to understand?
  - What do you think the right answer is?
  - Why?
  - After explaining any words that they did not understand and helping them to read the question and response options, ask them what they think the right answer is.

# BMJ Open

## Measuring ability to assess claims about treatment effects: The development of the "Claim Evaluation Tools"

|                                 |                                                                                                                                                                                                                                                                                                                                                                                                                                                                 |
|---------------------------------|-----------------------------------------------------------------------------------------------------------------------------------------------------------------------------------------------------------------------------------------------------------------------------------------------------------------------------------------------------------------------------------------------------------------------------------------------------------------|
| Journal:                        | <i>BMJ Open</i>                                                                                                                                                                                                                                                                                                                                                                                                                                                 |
| Manuscript ID                   | bmjopen-2016-013184.R1                                                                                                                                                                                                                                                                                                                                                                                                                                          |
| Article Type:                   | Research                                                                                                                                                                                                                                                                                                                                                                                                                                                        |
| Date Submitted by the Author:   | 06-Sep-2016                                                                                                                                                                                                                                                                                                                                                                                                                                                     |
| Complete List of Authors:       | Austvoll-Dahlgren, Astrid; Norwegian Institute Of Public Health, Semakula, Daniel; Makerere University College of Health Sciences, Nsangi, Allen; Makerere University College of Health Sciences, School of Medicine<br>Oxman, Andrew; Norwegian Health Services Research Centre<br>Chalmers, Iain; James Lind Initiative<br>Rosenbaum, Sarah; Nasjonalt folkehelseinstitutt<br>Guttersrud, Øystein; Norwegian Centre for Science Education, University of Oslo |
| <b>Primary Subject Heading</b>: | Patient-centred medicine                                                                                                                                                                                                                                                                                                                                                                                                                                        |
| Secondary Subject Heading:      | Research methods, Health policy, Public health                                                                                                                                                                                                                                                                                                                                                                                                                  |
| Keywords:                       | evidence based medicine, hared decision making, health literacy, outcome measurement, multiple-choice, patient education                                                                                                                                                                                                                                                                                                                                        |
|                                 |                                                                                                                                                                                                                                                                                                                                                                                                                                                                 |

SCHOLARONE™  
Manuscripts

Only

## Measuring ability to assess claims about treatment effects: The development of the “Claim Evaluation Tools”

Astrid Austvoll-Dahlgren, Daniel Semakula, Allen Nsangi, Andy Oxman, Iain Chalmers, Sarah Rosenbaum, Øystein Guttersrud, The IHC group\*

Leila Cusack

Claire Glenton

Tammy Hoffmann

Margaret Kaseje

Simon Lewin

Leah Atieno Marende

Angela Morrelli

Michael Mugisha

Laetitia Nyirazinyoye

Kjetil Olsen

Matthew Oxman

Nelson K. Sewamkambo

Anne Marie Uwitonze

Astrid Austvoll-Dahlgren (corresponding author)

[astrid.austvoll-dahlgren@fhi.no](mailto:astrid.austvoll-dahlgren@fhi.no)

+47 41294057

Norwegian Institute of Public Health

BOKS 7004 St.Olavsplass

0130 Oslo, Norway

Daniel Semakula

[semakuladaniel@gmail.com](mailto:semakuladaniel@gmail.com)

Makerere University College of Health Sciences.

New Mulago Hospital Complex, Administration Building, Second Floor.

P.O.Box 7072, Kampala Uganda

Allen Nsangi

[nsallen2000@yahoo.com](mailto:nsallen2000@yahoo.com)

Makerere University College of Health Sciences.

New Mulago Hospital Complex, Administration Building, Second Floor.

P.O.Box 7072, Kampala Uganda

Andrew D. Oxman

[oxman@online.no](mailto:oxman@online.no)

Norwegian Institute of Public Health

BOKS 7004 St.Olavsplass

0130 Oslo, Norway

Iain Chalmers

[ichalmers@jameslind.net](mailto:ichalmers@jameslind.net)

1  
2  
3  
4  
5  
6  
7  
8  
9  
10  
11  
12  
13  
14  
15  
16  
17  
18  
19  
20  
21  
22  
23  
24  
25  
26  
27  
28  
29  
30  
31  
32  
33  
34  
35  
36  
37  
38  
39  
40  
41  
42  
43  
44  
45  
46  
47  
48  
49  
50  
51  
52  
53  
54  
55  
56  
57  
58  
59  
60

Iain Chalmers  
Coordinator, James Lind Initiative  
Summertown Pavilion  
Middle Way  
Oxford OX2 7LG, UK

Sarah Rosenbaum  
[Sarah.rosenbaum@fhi.no](mailto:Sarah.rosenbaum@fhi.no)  
Norwegian Institute of Public Health  
BOKS 7004 St.Olavsplass  
0130 Oslo, Norway

Øystein Guttersrud  
[oystein.guttersrud@naturfagsenteret.no](mailto:oystein.guttersrud@naturfagsenteret.no)  
Norwegian Centre for Science Education, University of Oslo  
Postboks 1106, Blindern 0317 Oslo, Norway

**Keywords: evidence based medicine, shared decision making, health literacy, outcome measurement, multiple-choice, patient education**

## Abstract

**Objectives:** To describe the development of the Claim Evaluation Tools, a battery of multiple-choice items, to measure people's ability to understand and apply Key Concepts needed to assess claims about treatment effects.

**Setting:** Methodologists and members of the community in Uganda, Rwanda, Kenya, Norway, United Kingdom and Australia.

**Participants:** We used purposeful sampling of people with expertise in the Key Concepts, as well as patients and members of the public from both low and high-income countries in the iterative development of the items. This included four processes: (1) determining the scope of the Claim Evaluation Tools and development of items; (2) expert item review and feedback (n=63); (3) cognitive interviews with children and adult end-users (n=109); and (4) piloting and administrative tests (n=956).

**Results:** The Claim Evaluation Tools currently consists of between four and six multiple-choice items addressing each of the Key Concepts. Each item begins with a scenario intended to be relevant across contexts, and which can be used for children (from 10 years old and above), adult members of the public as well as health professionals. Methodologists and people with expertise in the Key Concepts judged the items to have face validity, and end-users judged them relevant and acceptable in their settings. In response to feedback from methodologists and end-users, we simplified some text, explained terms where needed, and redesigned formats and instructions.

### Conclusion:

The Claim Evaluation Tools include a battery of objective and flexible multiple-choice items, from which researchers, teachers and others can select those that are relevant for specific purposes or populations. These evaluation tools are being managed and made freely available for non-commercial use (on request) through the website Testing Treatments interactive ([testingtreatments.org](http://testingtreatments.org)).



## Strengths and limitations of this study

- To our knowledge, this is the first attempt to develop a set of evaluation tools that objectively measure people's ability to apply key concepts that people need to know to assess claims about treatment effects
- This development was led by researchers in high and low income countries, including feedback from people with methodological expertise and members of the public
- Based on qualitative and quantitative feedback, the Claim Evaluation Tools were found to have face validity and relevance in the studied contexts
- There are many ways of developing evaluation instruments. We chose to use a pragmatic and iterative approach, but the reliability of the items remains to be tested.

For peer review only

## Background

There are endless claims about treatments in the mass media, advertisements and everyday personal communication (1-4). Such claims may include strategies to prevent illness, such as changes in health behaviour or screening: therapeutic interventions or public health and system interventions. Many claims are unsubstantiated, and many patients and professionals alike may neither know whether the claims are true or false, nor have the necessary skills or tools to assess their reliability (5-11). As a result, people who believe and act on unvalidated claims may suffer by doing things that can be harmful, and by not doing things that can help. Either way, personal and societal resources for health care will be wasted (12).

The Informed Healthcare Choices (IHC) project aims to support the use of research evidence by patients and the public, policymakers, journalists and health professionals. The multidisciplinary group responsible for the project includes researchers in six countries - Norway, Uganda, Kenya, Rwanda, United Kingdom and Australia. The project is funded by the Research Council of Norway and has been responsible for developing and evaluating resources for two strategies to improve people's ability to assess claims about treatment effects. The first strategy involves the use of resources in primary schools to improve children's ability to assess claims about treatment effects. The second strategy uses podcasts to improve the ability of parents of primary school children to assess claims about treatment effects. We have piloted these resources in Uganda, Kenya, Rwanda and Norway, and the effects of the resources will be tested in randomized trials in Uganda (13, 14).

The IHC project group began by developing a list of key concepts that people need to understand to assess claims about treatment effects (15). This was done by using the second edition of the book "Testing Treatments" as our starting point, and by doing a literature review to identify key concepts and a review of critical appraisal tools for the public, journalists and health professionals (11, 15). The list of Key Concepts (Table 1) which emerged from this process was revised iteratively based on feedback from members of the project team and the IHC advisory group. The latter includes researchers, journalists, teachers and others with expertise in health literacy, and in teaching or communicating evidence-based health care (15). The resulting set list of concepts is an evolving document hosted by [testingtreatments.org](http://testingtreatments.org), and is reviewed annually to allow for revisions of existing concepts or

identification and inclusion of additional concepts. For the remainder of this paper, these will be referred to as Key Concepts.

| Key Concepts included in IHC intervention pilots | Informed Healthcare Choices Concepts                                                                                                                                             |
|--------------------------------------------------|----------------------------------------------------------------------------------------------------------------------------------------------------------------------------------|
|                                                  | <b>1. Recognising the need for fair comparisons of treatments</b><br><i>[Fair treatment comparisons are needed]</i>                                                              |
| x                                                | 1.1 Treatments may be harmful<br><i>[Treatments can harm]</i>                                                                                                                    |
| x                                                | 1.2 Personal experiences or anecdotes (stories) are an unreliable basis for determining the effects of most treatments<br><i>[Anecdotes are not reliable evidence]</i>           |
| x                                                | 1.3 A treatment outcome may be associated with a treatment, but not caused by the treatment<br><i>[Association is not necessarily causation]</i>                                 |
| x                                                | 1.4 Widely used or traditional treatments are not necessarily beneficial or safe<br><i>[Practice is often not based on evidence]</i>                                             |
| x                                                | 1.5 New, brand-named, or more expensive treatments may not be better than available alternatives<br><i>[New treatments are not always better]</i>                                |
| x                                                | 1.6 Opinions of experts or authorities do not alone provide a reliable basis for deciding on the benefits and harms of treatments<br><i>[Expert opinion is not always right]</i> |
| x                                                | 1.7 Conflicting interests may result in misleading claims about the effects of treatments<br><i>[Be aware of conflicts of interest]</i>                                          |
| x                                                | 1.8 Increasing the amount of a treatment does not necessarily increase the benefits of a treatment and may cause harm<br><i>[More is not necessarily better]</i>                 |
|                                                  | 1.9 Earlier detection of disease is not necessarily better<br><i>[Earlier is not necessarily better]</i>                                                                         |
| x                                                | 1.10 Hope can lead to unrealistic expectations about the effects of treatments<br><i>[Avoid unrealistic expectations]</i>                                                        |

|    |   |                                                                                                                                                                        |
|----|---|------------------------------------------------------------------------------------------------------------------------------------------------------------------------|
| 1  |   |                                                                                                                                                                        |
| 2  |   |                                                                                                                                                                        |
| 3  |   |                                                                                                                                                                        |
| 4  | x | 1.11 Beliefs about how treatments work are not reliable predictors of the actual effects of treatments<br><i>[Theories about treatment can be wrong]</i>               |
| 5  |   |                                                                                                                                                                        |
| 6  |   |                                                                                                                                                                        |
| 7  |   |                                                                                                                                                                        |
| 8  | x | 1.12 Large, dramatic effects of treatments are rare<br><i>[Dramatic treatment effects are rare]</i>                                                                    |
| 9  |   |                                                                                                                                                                        |
| 10 |   |                                                                                                                                                                        |
| 11 |   |                                                                                                                                                                        |
| 12 |   |                                                                                                                                                                        |
| 13 |   |                                                                                                                                                                        |
| 14 |   | 2. Judging whether a comparison of treatments is a fair comparison<br><i>[Treatment comparisons should be fair]</i>                                                    |
| 15 |   |                                                                                                                                                                        |
| 16 |   |                                                                                                                                                                        |
| 17 |   |                                                                                                                                                                        |
| 18 | x | 2.1 Evaluating the effects of treatments requires appropriate comparisons<br><i>[Treatment comparisons are necessary]</i>                                              |
| 19 |   |                                                                                                                                                                        |
| 20 |   |                                                                                                                                                                        |
| 21 |   |                                                                                                                                                                        |
| 22 | x | 2.2 Apart from the treatments being compared, the comparison groups need to be similar (i.e. 'like needs to be compared with like')<br><i>[Compare like with like]</i> |
| 23 |   |                                                                                                                                                                        |
| 24 |   |                                                                                                                                                                        |
| 25 |   |                                                                                                                                                                        |
| 26 |   | 2.3 People's experiences should be counted in the group to which they were allocated<br><i>[Base analyses on allocated treatment]</i>                                  |
| 27 |   |                                                                                                                                                                        |
| 28 |   |                                                                                                                                                                        |
| 29 |   |                                                                                                                                                                        |
| 30 | x | 2.4 People in the groups being compared need to be cared for similarly (apart from the treatments being compared)<br><i>[Treat comparison groups similarly]</i>        |
| 31 |   |                                                                                                                                                                        |
| 32 |   |                                                                                                                                                                        |
| 33 |   |                                                                                                                                                                        |
| 34 |   |                                                                                                                                                                        |
| 35 | x | 2.5 If possible, people should not know which of the treatments being compared they are receiving<br><i>[Blind participants to their treatments]</i>                   |
| 36 |   |                                                                                                                                                                        |
| 37 |   |                                                                                                                                                                        |
| 38 |   |                                                                                                                                                                        |
| 39 | x | 2.6 Outcomes should be measured in the same way (fairly) in the treatment groups being compared<br><br><i>[Assess outcome measures fairly]</i>                         |
| 40 |   |                                                                                                                                                                        |
| 41 |   |                                                                                                                                                                        |
| 42 |   |                                                                                                                                                                        |
| 43 |   |                                                                                                                                                                        |
| 44 |   |                                                                                                                                                                        |
| 45 | x | 2.7 It is important to measure outcomes in everyone who was included in the treatment comparison groups<br><i>[Follow up everyone included]</i>                        |
| 46 |   |                                                                                                                                                                        |
| 47 |   |                                                                                                                                                                        |
| 48 |   |                                                                                                                                                                        |
| 49 |   |                                                                                                                                                                        |
| 50 |   |                                                                                                                                                                        |
| 51 |   |                                                                                                                                                                        |
| 52 |   | <b>3. Understanding the role of chance</b><br><i>[Understand the role of chance]</i>                                                                                   |
| 53 |   |                                                                                                                                                                        |
| 54 |   |                                                                                                                                                                        |
| 55 |   |                                                                                                                                                                        |
| 56 |   |                                                                                                                                                                        |
| 57 |   |                                                                                                                                                                        |
| 58 |   |                                                                                                                                                                        |
| 59 |   |                                                                                                                                                                        |
| 60 |   |                                                                                                                                                                        |

|                                 |   |                                                                                                                                                                                                                       |
|---------------------------------|---|-----------------------------------------------------------------------------------------------------------------------------------------------------------------------------------------------------------------------|
| 1<br>2<br>3<br>4<br>5<br>6<br>7 | x | 3.1 Small studies in which few outcome events occur are usually not informative and the results may be misleading<br><i>[Small studies may be misleading]</i>                                                         |
| 8<br>9<br>10<br>11<br>12        |   | 3.2 The use of p-values to indicate the probability of something having occurred by chance may be misleading; confidence intervals are more informative<br><i>[P-values alone can be misleading]</i>                  |
| 13<br>14<br>15<br>16<br>17      |   | 3.3 Saying that a difference is statistically significant or that it is not statistically significant can be misleading<br><i>['Significance' may be misleading]</i>                                                  |
| 18<br>19                        |   |                                                                                                                                                                                                                       |
| 20<br>21<br>22                  |   | <b>4. Considering all of the relevant fair comparisons</b><br><i>[Consider all the relevant evidence]</i>                                                                                                             |
| 23<br>24<br>25<br>26            | x | 4.1 The results of single tests of treatments can be misleading<br><i>[Single studies can be misleading]</i>                                                                                                          |
| 27<br>28<br>29                  |   | 4.2 Reviews of treatment tests that do not use systematic methods can be misleading<br><i>[Unsystematic reviews can mislead]</i>                                                                                      |
| 30<br>31<br>32<br>33<br>34      |   | 4.3 Well done systematic reviews often reveal a lack of relevant evidence, but they provide the best basis for making judgements about the certainty of the evidence<br><i>[Consider how certain the evidence is]</i> |
| 35<br>36<br>37                  |   |                                                                                                                                                                                                                       |
| 38<br>39<br>40                  |   | <b>5. Understanding the results of fair comparisons of treatments</b><br><i>[Understand the results of comparisons]</i>                                                                                               |
| 41<br>42<br>43<br>44            | x | 5.1 Treatments may have beneficial and harmful effects<br><i>[Weigh benefits and harms of treatment]</i>                                                                                                              |
| 45<br>46<br>47                  |   | 5.2 Relative effects of treatments alone can be misleading<br><i>[Relative effects can be misleading]</i>                                                                                                             |
| 48<br>49<br>50<br>51            |   | 5.3 Average differences between treatments can be misleading<br><i>[Average differences can be misleading]</i>                                                                                                        |
| 52<br>53<br>54                  |   |                                                                                                                                                                                                                       |

|   |                                                                                                                                                      |
|---|------------------------------------------------------------------------------------------------------------------------------------------------------|
|   | <b>6. Judging whether fair comparisons of treatments are relevant</b><br><i>[Judge relevance of fair comparisons]</i>                                |
| x | 6.1 Fair comparisons of treatments should measure outcomes that are important<br><i>[Outcomes studied may not be relevant]</i>                       |
| x | 6.2 Fair comparisons of treatments in animals or highly selected groups of people may not be relevant<br><i>[People studied may not be relevant]</i> |
|   | 6.3 The treatments evaluated in fair comparisons may not be relevant or applicable<br><i>[Treatments used may not be relevant]</i>                   |
|   | 6.4 Results for a selected group of people within fair comparisons can be misleading<br><i>[Beware of subgroup analyses]</i>                         |

Table 1. Short list of key concepts people need to understand to assess claims about treatment effects

A systematic mapping review conducted as part of the IHC project concluded that the list of Key Concepts has wide interdisciplinary relevance, including in research areas such as use of decision support tools, training in evidence-based healthcare and critical appraisal, promotion of informed consent through improving understanding of trial methods, and school science education (16). Although, the common goal of these research fields is to facilitate informed decision-making, the research is heterogeneous. Partly overlapping and sometimes parallel research areas have been responsible for studies focusing on specific concepts, such as Key Concept 5.1 “weighing the benefits and harms of a treatment”, or the Key Concept 2.1 “Treatment comparisons are necessary” (16). Furthermore, we have not been able to identify any previous consensus or conceptualisation of Key Concepts critical to understanding the effects of treatments, nor have we found any instrument that measures understanding of all of the Key Concepts we have identified. Based on the findings of our systematic review, we concluded that the teaching resources we identified, and the procedures and instruments used to map or evaluate people’s understanding, covered only a handful of the Key Concepts (16).

In summary, we agreed that there existed a need to develop measurement instruments to assess people’s understanding of the Key Concepts. Accordingly, we set out to develop the Claim Evaluation Tools to serve as the primary outcome measures for evaluating the effects of the IHC primary school resources and the IHC podcast series in randomised trials. Although our primary target groups were children and adults in Uganda, we wanted to create a set of tools that would also be relevant in other

1  
2  
3 settings. Four important elements underpinned the development of the Claim Evaluation Tools. These  
4 tools should (i) objectively measure people's ability to apply the Key Concepts; (ii) be flexible and easily  
5 adaptable to particular populations or purposes; (iii) be rigorously evaluated; and (iv) be freely available  
6 for non-commercial use by others interested in mapping or evaluating people's ability to apply some or  
7 all of the Key Concepts.  
8  
9  
10  
11

## 12 13 14 **Objective**

15 To describe the development of the Claim Evaluation Tools, a set of objective and flexible tools to  
16 measure people's ability to apply Key Concepts needed to assess claims about treatment effects.  
17  
18  
19

## 20 21 **Methods**

22 The development of the Claim Evaluation Tools included four processes, using qualitative and  
23 quantitative methods, over three years (2013-2016): (i) determining the scope of the Claim Evaluation  
24 Tools and development of items; (ii) expert item review and feedback (face validity); (iii) cognitive  
25 interviews with end-users - including children, parents, teachers and patient representatives - to achieve  
26 relevance, understanding and acceptability; and (iv) piloting and practical administrative tests of the  
27 items in different contexts. For clarity, the methods and findings of each of these processes are  
28 described separately. However, development was iterative, with the different processes overlapping  
29 and feeding into each other. Researchers affiliated with the ICH project in six countries (Uganda, Norway,  
30 Rwanda, Kenya, UK and Australia) contributed to the development of the Claim Evaluation Tools. An  
31 overview of the development process is presented in Figure 1. The roles and purposes of the different  
32 research teams are described below.  
33  
34  
35  
36  
37  
38  
39  
40  
41  
42  
43  
44

45 *Please enter Figure 1. Overview and timeline of the development process*  
46  
47

### 48 **Determining the scope of the Claim Evaluation Tools and the development of items**

49 The Claim Evaluation Tools working group, with members of the IHC group from Norway, UK and  
50 Uganda (AA, AO, IC, DS, AN), had principal responsibility for agreeing on content, including the  
51 instructions and wording of individual items. The development and evaluations were coordinated by the  
52  
53  
54  
55  
56  
57  
58  
59  
60

1  
2  
3 team in Norway (AA and AO). The scope of the Claim Evaluation Tools was based on the list of Key  
4 Concepts (15)(see table 1).  
5  
6  
7

8  
9 Our vision for the Claim Evaluation Tools was that they should not be a standard fixed questionnaire, but  
10 rather a flexible tool including a battery of items, of which some may be more relevant to certain  
11 populations or purposes. Multiple-choice items are well suited for assessing application of knowledge,  
12 interpretation and judgements. In addition, they help problem-based learning and practical decision  
13 making (17). Each of the items we created opened with a scenario leading to a treatment claim and a  
14 question, which was followed by a choice of answers. We developed the items using two multiple-  
15 choice formats - single multiple-choice items (addressing one concept), and multiple true-false items  
16 (addressing several concepts in the same item). We developed all items with “one-best answer”  
17 response options (17), the options being placed on a continuum, with one answer being unambiguously  
18 the “best” and the remaining options as “worse”. All items were developed in English.  
19  
20  
21  
22  
23  
24  
25  
26

27  
28 The initial target groups for the Claim Evaluation Tools were fifth grade children (10 to 12 year-olds in  
29 the next to last year of primary school) and adults (parents of primary school children) in Uganda.  
30 However, throughout the development process, our goal was to create a set of tools that would be  
31 relevant in other settings. Accordingly, we used conditions and treatments that we judged likely to be  
32 relevant across different country contexts. Where necessary, we explained the conditions and  
33 treatments used in the opening scenarios. We also decided to avoid conditions and treatments that  
34 might lead the respondents to focus on the specific treatments (about which they might have an opinion  
35 or prior knowledge), rather than on the concepts.  
36  
37  
38  
39  
40  
41  
42

### 43 **Exploring relevance, understanding and acceptability of items**

44  
45 In order to get feedback on the relevance, understanding and acceptability of items, we used purposeful  
46 sampling of people with expertise in the Key Concepts, as well as patients and members of the public  
47 from both low and high-income countries (18-21).  
48  
49  
50

51  
52 ***Item review and feedback by methodologists (face validity)*** First we circulated the complete set of  
53 multiple-choice items to members of the IHC advisory group and asked them to comment on their  
54 applicability and face validity as judged against the list of Key Concepts. Each advisory group member  
55  
56  
57  
58  
59  
60



1  
2  
3 was assigned a set of three concepts, with associated items. A feedback form asked them to indicate to  
4 what extent they felt each item addressed the relevant Key Concept using the response options “Yes”,  
5 “No” or “Uncertain”, together with any open-ended comments. Any items that were tagged as “No” or  
6 “Uncertain” by one or more of those consulted were considered for revision.  
7  
8  
9

10  
11  
12 On two occasions, we also invited four methodologists associated with the Norwegian research group  
13 and with expertise in the concepts to respond to the full set of items. These experts were not involved in  
14 the project or the development of the Claim Evaluation Tools. In this element of the evaluation, the  
15 response options were randomised and the methodologists were blinded to the correct answers. They  
16 were asked to choose what they judged to be the best answer to each item’s question, and were  
17 encouraged to provide open-ended comments and flag any problems they identified. Any item in which  
18 one or more of the methodologists failed to identify the ‘best answer’ was considered for potential  
19 revision.  
20  
21  
22  
23  
24  
25

26  
27 We also invited people with expertise in the Key Concepts from all project partner countries to provide  
28 feedback on several occasions throughout the development of the tools. In addition to providing general  
29 feedback, an important purpose of reviewing the items in these different contexts was to identify any  
30 potential culturally inappropriate terminology and examples (conditions and treatments).  
31  
32  
33

34 For all of this feedback, suggested revisions and areas of improvement were summarised in an Excel  
35 worksheet in two categories: (i) comments of a general nature relating to all items, such as choice of  
36 terminology or format, and (ii) comments associated with specific items.  
37  
38  
39  
40

#### 41 ***Cognitive interviews with end-users on relevance of examples, understanding and acceptability***

42  
43 After the Claim Evaluation Tools working group and the IHC project group agreed on the instrument  
44 content, we undertook cognitive interviews with individuals from our potential target groups in Uganda,  
45 Australia, UK and Norway (22-24). Country representatives of the IHC project group recruited  
46 participants in their own contexts, based on purposeful sampling, in consultation with the Norwegian  
47 coordinator (AA). Since Uganda has been the principal focus of our interest, this was always our starting  
48 and ending point. In total, four rounds of interviews took place in Uganda. The interviews in Norway, UK  
49 and Australia were done to assess relevance within these settings.  
50  
51  
52  
53  
54  
55  
56  
57  
58  
59  
60

1  
2  
3 The overall objective of these interviews was to obtain feedback from potential end-users on the  
4 relevance of the scenarios (such as the conditions and treatments used as examples), and the  
5 intelligibility and acceptability of the scenarios, formats and instructions. This was particularly important  
6 because the items were to be used for children as well as adults. Throughout this process, we also  
7 piloted and user-tested several versions of the items (designs and instructions). Failure to address these  
8 issues when developing the items might increase the likelihood of missing responses, “guessing” or  
9 other measurement errors. For example, we wanted to minimise the influence of people’s cultural  
10 background on how they responded to the multiple-choice items. The effects of such confounders are  
11 being addressed in the last phase of the development in the psychometric testing and Rasch analysis of  
12 the questionnaire (25). The interviews were intended to help prevent such problems relatively early in  
13 the evaluation process.  
14  
15  
16  
17  
18  
19  
20  
21  
22  
23

24 Interviews were performed iteratively between October 2014 and January 2016, allowing for changes to  
25 the items between interviews. All interviews were conducted using a semi-structured interview guide  
26 (Appendix 1) inspired by previous research (22-24). As part of the interviews, the participants were given  
27 a sample set of the multiple-choice items and asked to respond to these. The interviews addressed  
28 questions raised during development of the items about the format of questions or the terminology  
29 used in the questions. In response, the interview guide was revised and multiple-choice items changed  
30 when relevant.  
31  
32  
33  
34  
35  
36  
37

38 When conducting the interviews, we used the methods of ‘think aloud’ and ‘verbal probing’, two  
39 approaches to cognitive interviewing (23). With “think aloud” the respondent is asked to explain how  
40 they arrived at their response to each item. Such interviews are less prone to bias because of the more  
41 limited role of the interviewer. However, some respondents have difficulty in verbalising their thought  
42 processes, and in these circumstances we followed up with “verbal probing”, which uses questions that  
43 the interviewer asks after the respondent has completed each of the items. Following each item the  
44 interviewer began with the “think aloud” method by asking respondents how they arrived at their  
45 response before asking more specific questions, as necessary.  
46  
47  
48  
49  
50  
51  
52

53 We audio recorded interviews when possible, and we aimed to have two people doing the interviews  
54 (with one person taking notes and the other person being the lead-interviewer). For practical reasons  
55  
56  
57  
58  
59  
60

1  
2  
3 this was not always possible. Each country representative summarised the key points from the  
4 interviews. Suggested revisions and areas of improvement were fed back to the Norwegian coordinator  
5 who entered these into the same Excel spreadsheet as the feedback from the methodologists.  
6  
7  
8  
9

### 10 ***Piloting and administrative tests***

11 We conducted five pilots of administering sets of the Claim Evaluation Tools to our target groups. The  
12 first pilot (March-April 2015) was an administrative test in a primary school in Uganda. This test was  
13 performed with a group of children who had taken part in a pilot of the IHC primary school resources as  
14 part of the IHC project, and with a comparison group who had not received training in the Key Concepts  
15 (in total 169 children). In this pilot, we administrated all items addressing 22 of the 32 Key Concepts (see  
16 Table 1). The reason for this cut-off was that these 22 concepts were targets of the intervention in the  
17 first draft of the IHC resources. Because of the large number of items to be tested, they were divided  
18 into four sets or questionnaires. These questionnaires were designed to be similar to the questionnaires  
19 to be used in the IHC trials, and would thus give us some feedback on how administrating a set of the  
20 Claim Evaluation Tools would work in practice, in a classroom setting. We also wanted to explore  
21 potential problems with incorrectly completed responses (through visual inspection of the responses).  
22  
23  
24  
25  
26  
27  
28  
29  
30  
31

32 The second pilot focused solely on format testing (September to December 2015). Three different sets  
33 of formats were tested. The formats were designed based on lessons learned from the feedback from  
34 the methodologists, interviews with end-users, and through visual inspection of the data collected in the  
35 first pilot. We recruited people in Uganda, Rwanda and Kenya to do this (N=204), using purposeful  
36 sampling, including children and adults. The same set of Claim Evaluation Tools was kept constant across  
37 the three formats. The outcome of this test was evaluated based on the number of missing or  
38 incorrectly completed responses per item.  
39  
40  
41  
42  
43  
44  
45

46 The third pilot (October to November 2015) and fourth pilot (November to December 2015) were  
47 conducted with Ugandan primary school children (in two schools) and their parents. The final pilot  
48 (December 2015) took place in Norway and included primary school children in one school. In all of  
49 these three pilots, we recruited children and adults who had taken part in the piloting of IHC primary  
50 school materials and podcast, and children and adults who had received no such intervention. The first  
51 objective of these pilots was to compare the ability of people who had and had not received training to  
52  
53  
54  
55  
56  
57  
58  
59  
60

1  
2  
3 apply the Key Concepts. This provided an indication of the sample-sizes that would be needed for the  
4 IHC randomised trials. The second objective of the pilots was to estimate the frequency of missing  
5 responses as an indication of problems of understanding the item's instructions. For these purposes, we  
6 used only one set of the Claim Evaluation Tools (addressing the 22 basic concepts). The reason for this  
7 was that we needed to reduce the number of items to gain statistical power in these small samples. In  
8 total, 197 children took part in the Ugandan school pilot, 301 parents took part in the podcast pilot, and  
9 85 children took part in the Norwegian school pilot. The results of these pilots were summarised by  
10 calculating mean correct responses to all items addressing the same concept. We also calculated missing  
11 responses per item.  
12  
13  
14  
15  
16  
17  
18  
19  
20

## 21 **Results**

### 22 **Feedback from experts and members of the target groups**

#### 23 ***Face validity, perceived relevance and fit to the target group***

24  
25 We created 6 to 8 items per Key Concept, predicting that about half of these would be removed through  
26 feedback from experts, end-users and through the final psychometric testing and Rasch analysis (25).  
27 Thirteen members of the IHC advisory group provided feedback on 135 items. Only one of these items  
28 was judged to have addressed the concept inadequately, and a further 20 items were deemed to be  
29 partly relevant. Feedback from the two blinded assessments of the Claim Evaluation Tools provided by  
30 the methodologists supported the items relevance to the Key Concepts.  
31  
32  
33  
34  
35  
36  
37  
38

39 Another important element of the feedback from the test-run with the methodologists was that the  
40 'distance' between the "best" option and the "worse" options was considered too small, with the result  
41 that the items were too difficult. Based on this feedback, we revised the 'distractors' in the 'worse'  
42 options to make them more "wrong". The cognitive interviews with members of our target group also  
43 suggested that the items were too 'text heavy' and needed to be simplified. In relation to this, low-  
44 literacy skill was also raised as a potential barrier by experts and end-users in Uganda. Consequently, we  
45 tried hard to make the scenarios as simple as possible without losing key content.  
46  
47  
48  
49  
50  
51  
52

53 The end-users and the methodologists consulted in each country (Uganda, Kenya, Rwanda, UK, and  
54 Australia), also provided comments on terminology, as well as on the examples used in the scenarios  
55 that they felt might not be appropriate or would need to be explained. The Claim Evaluation Tools  
56  
57  
58  
59  
60

1  
2  
3 working group considered these comments and revised the items. When we were unable to avoid using  
4 certain terms (for example, “research study”), we added explanations. Our rationale was that some  
5 terms would present a barrier to understanding the items, but were not considered to be part of the  
6 learning objectives associated with the Key Concepts. For some other terms, we used alternatives  
7 deemed acceptable by researchers, other experts and members of the target groups in each country  
8 (Uganda, Kenya, Rwanda, UK, Australia and Norway). This process involved feeding back all changes to  
9 experts and end-users in an iterative process with continuous revisions.  
10  
11  
12  
13  
14

15  
16  
17 *Please enter Figure 2. Example of formats*  
18  
19

### 20 ***Preference of format and missing responses***

21 Important objectives of the interviews with end-users were to obtain their preferences on format, to  
22 follow the steps of their reasoning when responding to the items and to assess their understanding of  
23 the items’ instructions. The main message was that people preferred a mix of the simple-multiple choice  
24 and multiple true-false formats to make the questionnaire more interesting. The items were otherwise  
25 well-received. The general feedback from all the different country settings was that the formats were  
26 acceptable, recognisable and similar to multiple-choice formats they had encountered in other settings.  
27  
28  
29  
30  
31  
32

33  
34 Based on verbal feedback, as well as visual inspection of how people responded to the items in the  
35 pilots, two potential ways were identified to prevent missing or incorrectly completed responses. The  
36 first was to avoid unnecessary open spaces in the items, because respondents tended to use these to  
37 write open-ended answers to the questions. The second was to avoid using check boxes, because  
38 respondents would check more than one check-box. These issues are easily dealt with when  
39 questionnaires are administrated electronically, but are a problem in paper-administered questionnaires.  
40 Examples of incorrectly filled in multiple-choice questions are shown in Figure 3. Figure 2 shows the  
41 design changes used to avoid these problems.  
42  
43  
44  
45  
46  
47

48  
49  
50 *Please enter Figure 3. Examples of incorrectly filled in multiple-choice questions*  
51  
52

### 53 ***Pilots and administrative tests***

1  
2  
3 The first school pilot in Uganda (March- April 2015) revealed problems with instructions and formats  
4 that resulted in mean missing responses of 20-40% of the items. The revised designs (Figure 2) we  
5 tested in the second pilot in Uganda, Rwanda and Kenya (September to December 2015) greatly  
6 improved people's responses to the questionnaire, reducing missing or incorrectly completed responses  
7 to between <4% of items. Based on this pilot, we made final revisions and decided on the formats to be  
8 used in the subsequent pilots.  
9

10  
11  
12  
13  
14  
15 The third, fourth and fifth pilots conducted in Uganda and Norway (October to December 2015),  
16 confirmed the appropriateness of the formats, and missing or incorrectly completed responses were  
17 <2%. These pilots also confirmed that respondents took between 30 to 60 minutes to complete a  
18 questionnaire that included demographic questions and a sample of 29 items. The participants' correct  
19 responses per Key Concept are shown in Figure 4. The participants who had taken part in piloting of the  
20 IHC resources did slightly better than others for most of the Key Concepts.  
21  
22  
23  
24  
25  
26

27 *Please enter Figure 4. Distribution of correct answers in pilots*  
28  
29  
30

## 31 Discussion

32  
33 Developing a new evaluation instrument is not straightforward, and requires rigorous testing using  
34 qualitative and quantitative methods (26). There are many ways of doing this. We chose to use a  
35 pragmatic and iterative approach, involving feedback from experts and end-users and continuous  
36 revisions. This development work was made possible by a multidisciplinary, international collaboration  
37 including people from high and low-income countries. Despite differences between countries, enabling  
38 people to assess treatment claims in their daily lives is a challenge across all countries. The Claim  
39 Evaluation Tools were developed to be used in the IHC project's trials, but also to provide a flexible  
40 measurement tool for others interested in mapping or evaluation of people's ability to apply Key  
41 Concepts in assessing claims about treatment effects. Instead of a "set" instrument, the Claim  
42 Evaluation Tools offers the potential to tailor an instrument for specific purposes and target groups. This  
43 is useful also for others as the Key Concepts included in interventions may vary, and in this way, the end-  
44 users are not forced to respond to unnecessary questions addressing concepts that have not been part  
45 of the intervention. The Claim Evaluations Tools will be made available on demand through the website  
46  
47  
48  
49  
50  
51  
52  
53  
54  
55  
56  
57  
58  
59  
60

1  
2  
3 testingtreatments.org, and we envision that educators, researchers and others can create their own  
4  
5 “tests” that fit their needs and contexts.  
6  
7

8  
9 An international group of people with relevant expertise considered that the items we developed  
10 appropriately addressed the Key Concepts we had identified. The items were considered by end-users to  
11 be acceptable in the four settings in which we conducted interviews: Uganda, Norway, UK and Australia.  
12 Certain terms were identified as problematic, so we either simplified the terminology or added  
13 explanations. Based on lessons learned from interviews and pilots, we redesigned formats that had led  
14 to missing or incorrectly completed responses, with a resultant fall in the frequency of these problems  
15 to less than 2%.  
16  
17  
18  
19  
20

21  
22 Feedback from methodologists and end-users indicated that some items were rather difficult and text-  
23 heavy. Literacy was also raised as a potential barrier. In response to these findings, we tried to shorten  
24 texts, to avoid unnecessarily difficult terminology, and to add explanations where necessary. This  
25 emphasised the importance of measuring literacy skills when administering the Claim Evaluation Tools  
26 in certain settings, as this might impact how well people perform on the items and act as a potential  
27 confounder.  
28  
29  
30  
31  
32

33  
34 Many of the instruments that have been developed to assess people’s critical-appraisal skills have relied  
35 on self-report by respondents of their own abilities (subjective measurements). Typical examples are the  
36 many health literacy instruments, such as the European Health Literacy Survey (HLS-EU)(27) and  
37 instruments used to assess competence in evidence-based medicine (28). Self-assessed abilities can be  
38 difficult to interpret, and have been found to have a weak association with objectively measured  
39 knowledge and skills (29-31). It can also be argued that such instruments measure the confidence of  
40 respondents in their own ability rather than their knowledge or actual ability. Although improved  
41 confidence in one’s own abilities may be a relevant and important effect of an intervention, our primary  
42 objective was to develop an instrument to measure objective knowledge and actual ability to apply the  
43 Key Concepts when confronted with claims about treatments effects.  
44  
45  
46  
47  
48  
49  
50  
51  
52

53 This paper describes the development and initial steps of validation of items addressing all of the 32 Key  
54 Concepts including four phases. In the last phase, we also did some pilot testing for which items  
55  
56  
57  
58  
59  
60

1  
2  
3 referring to 22 of the 32 Key Concepts were included. The objectives of these pilots were several, but for  
4 development purposes, we wanted to do practical administrative tests to explore the understanding of  
5 formats and timing of Claim Evaluation Tools “sample tests”. Which Key Concepts were targeted in  
6 these pilots, were judged to be of little importance as the items addressing the different key Concepts  
7 use the same formats and are equal in length and language. It is however important to note that this  
8 paper does not describe the reliability of the Claim Evaluation Tools. This requires rigorous psychometric  
9 testing including Rasch analysis, and is described in a separate paper which also provides information  
10 about the difficulty of the items, and other properties of the items as described by the Rasch analysis  
11 (25).  
12  
13  
14  
15  
16  
17  
18  
19  
20  
21  
22  
23  
24  
25

## 26 **Conclusion**

27  
28 We developed the Claim Evaluation Tools to evaluate people’s ability to assess claims about the effects  
29 of treatments. As far as we are aware, this is currently the only evaluation instrument designed to  
30 address all of the Key Concepts we believe people need to know to assess claims about treatment  
31 effects. This work is the result of a multidisciplinary, international collaboration including high and low-  
32 income countries. We have used a pragmatic and iterative approach, involving feedback from experts  
33 and end-users and continuous revisions. Although the Claim Evaluation Tools have been developed  
34 primarily to be used as part of the IHC project in Uganda, we believe they should be useful for others  
35 interested in evaluating people’s ability to apply the Key Concepts. Feedback from experts and end-  
36 users in Uganda, Kenya, Rwanda, Norway, UK and Australia supports our hope that they will be found  
37 relevant in other contexts.  
38  
39  
40  
41  
42  
43  
44  
45

46  
47 The Claim Evaluation Tools is a flexible instrument including a battery of items from which researchers  
48 can select those relevant for specific populations or purposes. The Claim Evaluation Tools currently  
49 consist of four to six multiple-choice items addressing each of the concepts in the list of Key Concepts.  
50 However, we anticipated that the Claim Evaluation Tools will continue to evolve. Maintenance and  
51 revision of the Claim Evaluation Tools will reflect changes in the list of Key Concepts, as well as additions  
52 or changes made on the basis of further feedback, pilot testing, cognitive interviews and Rasch analyses  
53  
54  
55  
56  
57  
58  
59  
60



1  
2  
3 with different target groups and in different settings. The Claim Evaluation Tools will be hosted on the  
4 Testing Treatments interactive website and managed by the Claim Evaluation Tools working group. On  
5  
6 request, all items are freely available for non-commercial use.  
7  
8  
9  
10

### 11 **Authors' Contributions**

12 AA, ØG, AO wrote the protocol and the IHC group provided comments on the protocol. AA coordinated  
13  
14 all of the development and evaluation process with support from AO. AA, DS, AN, IC, AO and MO drafted  
15  
16 the items with input from the IHC group. AA, IC and AO were responsible for revising the items  
17  
18 iteratively based on the feedback received through the different processes. SR and AA were responsible  
19  
20 for the format designs. AA and KO approached the IHC advisory group and other methodologists for  
21  
22 feedback. AN, DS, LC, AA, MO, SR, TH and MK conducted the interviews with end-users. AN, DS, KO, LAM,  
23  
24 MM, LAM, MK, NS, AMU and AA were involved in pilots and administrative tests in Uganda, Kenya,  
25  
26 Rwanda and Norway respectively. AA analysed the data from the pilots. AA authored this manuscript  
27  
28 with significant input from the rest of the IHC group.  
29  
30

### 31 **Acknowledgements**

32  
33 We are deeply grateful to all of the enthusiastic children, parents and teachers that contributed to this  
34  
35 project. We would also like to thank the IHC advisory panel, and the other experts that provided their  
36  
37 advice. In particular we would like to thank Sophie Robinson, Ruth Davis, Andrew Garratt, Chris Del Mar,  
38  
39 Susan Munabi Babigumira, Jenny Moberg, Signe Agnes Flottorp, Simon Goudie, Esme Lynch and Gunn  
40  
41 Vist.  
42  
43

### 44 **Funding and competing interests**

45  
46 The IHC project is funded in part by the Research Council of Norway- GLOBVAC project 220603. The  
47  
48 authors declare no conflicts of interests.  
49  
50

### 51 **Ethical approval**

52  
53 Ethical approval was sought by the IHC project representatives in each country.  
54  
55  
56  
57  
58  
59  
60

## Data sharing statement

All data are published as part of this study. All Claim Evaluation Tools are available upon request for non-commercial use.

## References

1. Lewis M, Orrock P, Myers S. Uncritical reverence in CM reporting: Assessing the scientific quality of Australian news media reports. *Health Sociology Review*. 2010;19(1):57-72.
2. Glenton C, Paulsen E, Oxman A. Portals to Wonderland? Health portals lead confusing information about the effects of health care. *BMC Medical Informatics and Decision Making*. 2005;5:7:8.
3. Moynihan R, Bero L, Ross-Degnan D, Henry D, Lee K, Watkins J, et al. Coverage by the news media of the benefits and risks of medications. *The New England Journal of Medicine*. 2000;342(22):1645-50.
4. Wolfe R, Sharp L, Lipsky M. Content and design attributes of antivaccination web sites. *Journal of American Medical Association*. 2002;287(24):3245-48.
5. Woloshin S, Schwartz L, Byram S, Sox H, Fischhoff B, Welch H. Women's understanding of the mammography screening debate. *Archives of Internal Medicine* 2000;160:1434-40.
6. Fox S, Duggan M. Health Online 2013 09.04.2013. Available from: <http://www.pewinternet.org/Reports/2013/Health-online.aspx>.
7. Robinson E, Kerr C, Stevens A, Lilford R, Braunholtz D, Edwards S, et al. Lay public's understanding of equipoise and randomisation in randomised controlled trials. Research Support, Non-U.S. Gov't. NHS R&D HTA Programme, 2005 Mar. Report No.: 1366-5278 (Linking) Contract No.: 8.
8. Sillence E, Briggs P, Harris PR, Fishwick L. How do patients evaluate and make use of online health information? *Social Science & Medicine*. 2007;64(9):1853-62.
9. Horsley T, Hyde C, Santesso N, Parkes J, Milne R, Stewart R. Teaching critical appraisal skills in healthcare settings. *Cochrane Database of Systematic Reviews*. 2011(11).
10. Stacey D, Bennett CL, Barry MJ, Col NF, Eden KB, Holmes-Rovner M, et al. Decision aids for people facing health treatment or screening decisions. *Cochrane Database of Systematic Reviews*. 2011(10).
11. Evans I, Thornton H, Chalmers I, P. G. *Testing Treatments: better research for better healthcare*. Second edition. London: Pinter & Martin Ltd 2011. Available from: Available online at [www.testingtreatments.org/new-edition/](http://www.testingtreatments.org/new-edition/).
12. Chalmers I., Glasziou P., Badenoch D., Atkinson P., Austvoll-Dahlgren A., Oxman A. Evidence Live 2016: Promoting informed healthcare choices by helping people assess treatment claims. *BMJ*; 26.06.2016.
13. Nsangi A., Semakula D., Oxman M., Austvoll-Dahlgren A., Rosenbaum S., Kaseje M., et al. Evaluation of resources to teach children in low income countries to assess claims about treatment effects. Protocol for a randomized trial. Submitted manuscript. 2016.
14. Semakula D., Nsangi A., Oxman M., Austvoll-Dahlgren A., Rosenbaum S., Kaseje M., et al. Can an educational podcast improve the ability of parents of primary school children to assess claims about the benefits and harms of treatments? Protocol for a randomized trial Submitted manuscript. 2016.

15. Austvoll-Dahlgren A, Oxman AD, Chalmers I, Nsangi A, Glenton C, Lewin S, et al. Key concepts that people need to understand to assess claims about treatment effects. *Journal of Evidence-Based Medicine*. 2015;8(3):112-25.
16. Austvoll-Dahlgren A, Nsangi A, Semakula D. Key concepts people need to understand to assess claims about treatment effects: a systematic mapping review of interventions and evaluation tools. Submitted paper. 2016.
17. Case SC, DB S. *Constructing Written Test Questions For the Basic and Clinical Sciences* (Third edition). Philadelphia, USA: 2002.
18. Williamson PR, Altman DG, Blazeby JM, Clarke M, Devane D, Gargon E, et al. Developing core outcome sets for clinical trials: issues to consider. *Trials*. 2012;13.
19. Cooney RM, Warren BF, Altman DG, Abreu MT, Travis SPL. Outcome measurement in clinical trials for Ulcerative Colitis: towards standardisation. *Trials*. 2007;8.
20. Tugwell P, Boers M, Brooks P, Simon L, Strand V, Idzerda L. OMERACT: An international initiative to improve outcome measurement in rheumatology. *Trials*. 2007;8.
21. Basch E, Aronson N, Berg A, Flum D, Gabriel S, Goodman S, et al. Methodological Standards and Patient-Centeredness in Comparative Effectiveness Research The PCORI Perspective. *Journal of the American Medical Association*. 2012;307(15):1636-40.
22. Watt T, Rasmussen AK, Groenvold M, Bjorner JB, Watt SH, Bonnema SJ, et al. Improving a newly developed patient-reported outcome for thyroid patients, using cognitive interviewing. *Qual Life Res*. 2008;17(7):1009-17.
23. McColl E, Meadows K, Barofsky I. Cognitive aspects of survey methodology and quality of life assessment. *Qual Life Res*. 2003;12(3):217-8.
24. Bloem EF, van Zuuren FJ, Koenenman MA, Rapkin BD, Visser MR, Koning CC, et al. Clarifying quality of life assessment: do theoretical models capture the underlying cognitive processes? *Qual Life Res*. 2008;17(8):1093-102.
25. Austvoll-Dahlgren A, Gutterusrud G, Nsangi A, Semakula D, Oxman A, group. TI. Measuring ability to assess claims about treatment effects: A latent trait analysis of the "Claim Evaluation Tools" using Rasch modelling. Submitted paper. 2016.
26. Mokkink LB, Terwee CB, Patrick DL, Alonso J, Stratford PW, Knol DL, et al. The COSMIN checklist for assessing the methodological quality of studies on measurement properties of health status measurement instruments: an international Delphi study. *Qual Life Res*. 2010;19(4):539-49.
27. Sorensen K, Pelikan JM, Rothlin F, Ganahl K, Slonska Z, Doyle G, et al. Health literacy in Europe: comparative results of the European health literacy survey (HLS-EU). *Eur J Public Health*. 2015;25(6):1053-8.
28. Shaneyfelt T, Baum KD, Bell D, Feldstein D, Houston TK, Kaatz S, et al. Instruments for evaluating education in evidence-based practice: a systematic review. *JAMA*. 2006;296(9):1116-27.
29. Dahm P, Poolman RW, Bhandari M, Fesperman SF, Baum J, Kosiak B, et al. Perceptions and competence in evidence-based medicine: a survey of the American Urological Association Membership. *J Urol*. 2009;181(2):767-77.
30. Khan KS, Awonuga AO, Dwarakanath LS, Taylor R. Assessments in evidence-based medicine workshops: loose connection between perception of knowledge and its objective assessment. *Med Teach*. 2001;23(1):92-4.
31. Joffe S, Cook EF, Cleary PD, Clark JW, Weeks JC. Quality of informed consent in cancer clinical trials: a cross-sectional survey. *Lancet*. 2001;358(9295):1772-7.

1  
2  
3  
4  
5  
6  
7  
8  
9  
10  
11  
12  
13  
14  
15  
16  
17  
18  
19  
20  
21  
22  
23  
24  
25  
26  
27  
28  
29  
30  
31  
32  
33  
34  
35  
36  
37  
38  
39  
40  
41  
42  
43  
44  
45  
46  
47  
48  
49  
50  
51  
52  
53  
54  
55  
56  
57  
58  
59  
60

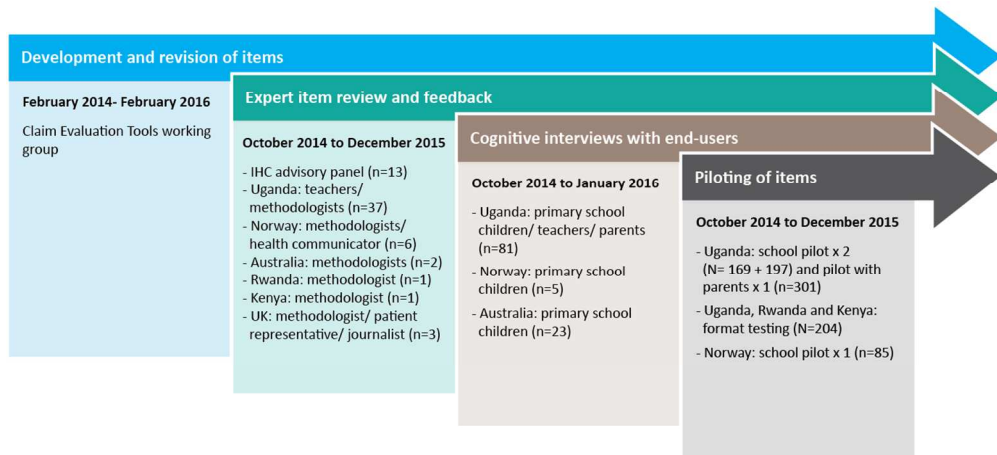

Peer review only

1  
2  
3  
4  
5  
6  
7  
8  
9  
10  
11  
12  
13  
14  
15  
16  
17  
18  
19  
20  
21  
22  
23  
24  
25  
26  
27  
28  
29  
30  
31  
32  
33  
34  
35  
36  
37  
38  
39  
40  
41  
42  
43  
44  
45  
46  
47  
48  
49  
50  
51  
52  
53  
54  
55  
56  
57  
58  
59  
60

Concept 1.3  
Judith wants smoother skin. The younger girls in her school have smoother skin than the older girls. Judith thinks this is because the younger girls use cream on their skin to make the skin smoother.

**Question: Based on this link between using cream and smooth skin, is Judith correct?**

*Options:*

- A) It is not possible to say. It depends on how many younger and older girls there are
- B) It is not possible to say. There might be other differences between the younger and older girls
- C) Yes, because the younger girls use cream on their skin and they have smoother skin
- D) No, Judith should try using the cream herself to see if it works for her

Answer:

|          |                                                                                                                                                                                                                            |              |                 |
|----------|----------------------------------------------------------------------------------------------------------------------------------------------------------------------------------------------------------------------------|--------------|-----------------|
| Concepts | When you are sick, sometimes people say that something - a <u>treatment</u> - is good for you. It is hard to know whether what they say is true.<br><b>Do you agree or disagree with each of the following statements?</b> |              |                 |
|          | <i>For each statement below, use ✓ to mark whether you agree or disagree.</i>                                                                                                                                              |              |                 |
|          | <b>Statements:</b>                                                                                                                                                                                                         | <b>Agree</b> | <b>Disagree</b> |
| 1.1      | James says that a treatment cannot be helpful and harmful at the same time                                                                                                                                                 |              |                 |
| 1.2      | Peter says that if a treatment works for one person, the treatment will help others too                                                                                                                                    |              |                 |
| 1.3      | Alice says that if some people try the treatment and feel better, this means that the treatment helps                                                                                                                      |              |                 |

173x199mm (300 x 300 DPI)

George has a stomachache. The last time George had a stomachache was two months ago. That time, he drank some hot milk and after an hour, his stomachache was gone. Therefore, George says hot milk cures stomachaches.

**QUESTION:**

Is George right?

PLEASE CIRCLE THE ANSWER THAT YOU THINK IS THE BEST

- A. No, it is only based on George's own experience treating a stomachache with hot milk.
- B. Not possible to say, the fact that he improved could have happened by chance.
- C. Yes, George's own experience is evidence enough for assessing the effects of hot milk for treating a stomachache.
- D. No, it is important to ask what other people think too, not just George.

Outside the city where Paul lives, there is a mine. The miners often get coughs. For many years, most of the miners have used whiskey mixed in water to reduce the pain from their coughs. Therefore, Paul says that water with a little whiskey is an effective and harmless treatment for a cough, since many people have used it for a long time.

**QUESTION:**

Do you agree with Paul?

PLEASE CIRCLE THE ANSWER THAT YOU THINK IS THE BEST

- A. No, just because whiskey mixed in water has been used by many, does not mean that it is harmless.
- B. No, just because whiskey mixed in water have been used a lot, does not mean that it is the best treatment.
- C. Yes, the miners have used whiskey mixed in water to treat their coughs for many years and they would not use the treatment for many years if it were not beneficial and harmless.
- D. Not possible to say, Paul should try whiskey mixed in water on himself to know for sure that he is correct.

Andrew has difficulty breathing. He goes to the shop to buy medicine. The shopkeeper gives Andrew tablet and says it will help improve his breathing. Andrew thinks if taking one tablet will help him, then taking two tablets will help him even more. Should Andrew take one or two tablets? Mark an X in the box for the best answer (only one)

- One. Taking two is likely to be harmful and more expensive
- One. Taking more than one will not necessarily be more helpful and may be harmful
- One. Andrew should listen to the shopkeeper's advice
- Two. Taking more than one will probably help him get better more quickly and is unlikely to be harmful

82x215mm (300 x 300 DPI)

1  
2  
3  
4  
5  
6  
7  
8  
9  
10  
11  
12  
13  
14  
15  
16  
17  
18  
19  
20  
21  
22  
23  
24  
25  
26  
27  
28  
29  
30  
31  
32  
33  
34  
35  
36  
37  
38  
39  
40  
41  
42  
43  
44  
45  
46  
47  
48  
49  
50  
51  
52  
53  
54  
55  
56  
57  
58  
59  
60

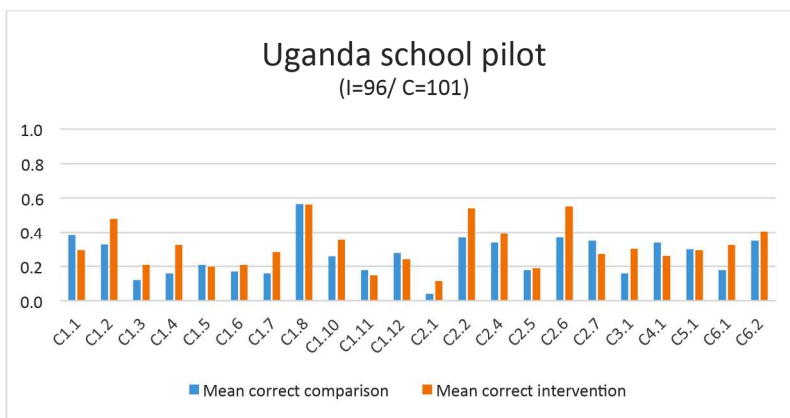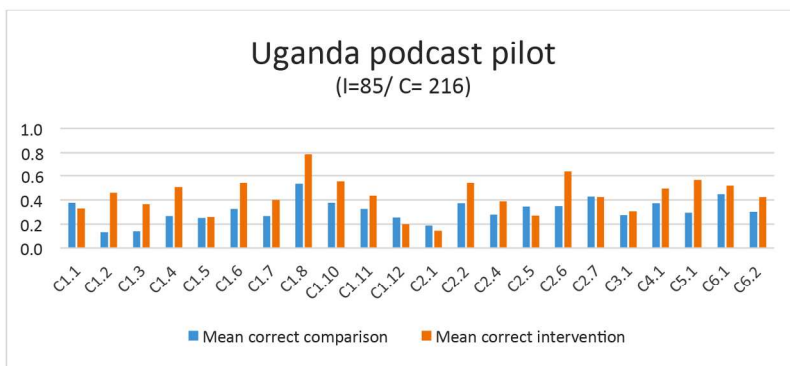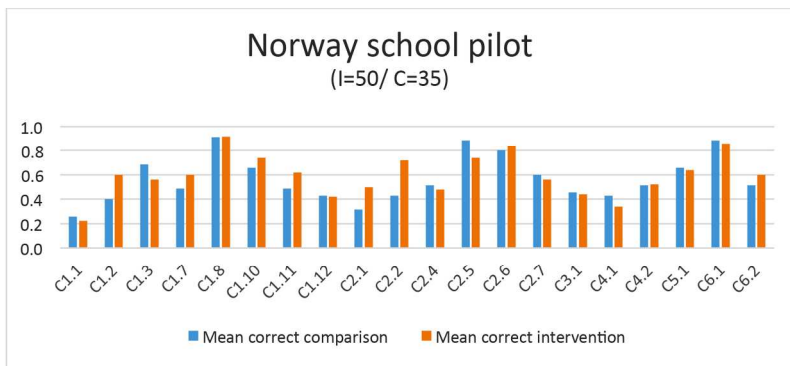

148x215mm (300 x 300 DPI)

## Example interview guide version 1

1. Introductions and information about purpose  
(The purpose of the interview is not to evaluate how participants perform on the questions, but to get feedback on the questions, i.e. comprehension and relevance)
2. Steps of reasoning (per item)
  - What was your response?
  - Can you tell me why you choose this response category? (steps of reasoning)
3. Relevance (per item)
  - What did you think of the scenario?
    - Probe:
      - Names
      - Treatment
      - Outcome
      - Other comments



## Example interview guide version 2

### Content and format of CLAIM

1. Introductions and information about purpose  
(The purpose of the interview is not to evaluate how participants perform on the questions, but to get feedback on the questions, i.e. comprehension and relevance)
4. Tell me about the test, what did you think about it?
  - First impression?
  - Similarities to other tests or exams?
  - Like/ doesn't like these differences?
5. What did you think about the instructions?
  - The test include different formats (show examples of SMC's and MMC's), what did you think of them?
  - The test also included some questions about behavior and attitudes, what did you think of them?
  - Do you think these questions fit your age group?
  - Was there any information you felt was missing?
6. What about the content of the test, was it easy or not easy for you to answer the questions?
  - What made it easy or not easy?
  - Were there any words you did not understand or otherwise reacted to?

### Literacy / understanding of CLAIM questions

7. Ask the respondent to read question 3 (concept 1.2) and question 14 (concept 2.2) from the CLAIM questionnaire that was used.
  - Was it easy or hard to understand that question?
  - What words were hard to understand?
  - What do you think the right answer is?
  - Why?
  - After explaining any words that they did not understand and helping them to read the question and response options, ask them what they think the right answer is.

# BMJ Open

## Measuring ability to assess claims about treatment effects: The development of the "Claim Evaluation Tools"

|                                 |                                                                                                                                                                                                                                                                                                                                                                                                                                                                 |
|---------------------------------|-----------------------------------------------------------------------------------------------------------------------------------------------------------------------------------------------------------------------------------------------------------------------------------------------------------------------------------------------------------------------------------------------------------------------------------------------------------------|
| Journal:                        | <i>BMJ Open</i>                                                                                                                                                                                                                                                                                                                                                                                                                                                 |
| Manuscript ID                   | bmjopen-2016-013184.R2                                                                                                                                                                                                                                                                                                                                                                                                                                          |
| Article Type:                   | Research                                                                                                                                                                                                                                                                                                                                                                                                                                                        |
| Date Submitted by the Author:   | 12-Oct-2016                                                                                                                                                                                                                                                                                                                                                                                                                                                     |
| Complete List of Authors:       | Austvoll-Dahlgren, Astrid; Norwegian Institute Of Public Health, Semakula, Daniel; Makerere University College of Health Sciences, Nsangi, Allen; Makerere University College of Health Sciences, School of Medicine<br>Oxman, Andrew; Norwegian Health Services Research Centre<br>Chalmers, Iain; James Lind Initiative<br>Rosenbaum, Sarah; Nasjonalt folkehelseinstitutt<br>Guttersrud, Øystein; Norwegian Centre for Science Education, University of Oslo |
| <b>Primary Subject Heading</b>: | Patient-centred medicine                                                                                                                                                                                                                                                                                                                                                                                                                                        |
| Secondary Subject Heading:      | Research methods, Health policy, Public health                                                                                                                                                                                                                                                                                                                                                                                                                  |
| Keywords:                       | evidence based medicine, hared decision making, health literacy, outcome measurement, multiple-choice, patient education                                                                                                                                                                                                                                                                                                                                        |
|                                 |                                                                                                                                                                                                                                                                                                                                                                                                                                                                 |

SCHOLARONE™  
Manuscripts

Only

## Measuring ability to assess claims about treatment effects: The development of the “Claim Evaluation Tools”

**Astrid Austvoll-Dahlgren (corresponding author), Daniel Semakula, Allen Nsangi, Andy Oxman, Iain Chalmers, Sarah Rosenbaum, Øystein Guttersrud, The IHC group\***

**Leila Cusack**

**Claire Glenton**

**Tammy Hoffmann**

**Margaret Kaseje**

**Simon Lewin**

**Leah Atieno Marende**

**Angela Morrelli**

**Michael Mugisha**

**Laetitia Nyirazinyoye**

**Kjetil Olsen**

**Matthew Oxman**

**Nelson K. Sewamkambo**

**Anne Marie Uwitonze**

**Astrid Austvoll-Dahlgren (corresponding author)**

**[astrid.austvoll-dahlgren@fhi.no](mailto:astrid.austvoll-dahlgren@fhi.no)**

**+47 41294057**

**Norwegian Institute of Public Health**

**BOKS 7004 St.Olavsplass**

**0130 Oslo, Norway**

**Daniel Semakula**

**[semakuladaniel@gmail.com](mailto:semakuladaniel@gmail.com)**

**Makerere University College of Health Sciences.**

**New Mulago Hospital Complex, Administration Building, Second Floor.**

**P.O.Box 7072, Kampala Uganda**

**Allen Nsangi**

**[nsallen2000@yahoo.com](mailto:nsallen2000@yahoo.com)**

**Makerere University College of Health Sciences.**

**New Mulago Hospital Complex, Administration Building, Second Floor.**

**P.O.Box 7072, Kampala Uganda**

**Andrew D. Oxman**

**[oxman@online.no](mailto:oxman@online.no)**

**Norwegian Institute of Public Health**

**BOKS 7004 St.Olavsplass**

**0130 Oslo, Norway**

**Iain Chalmers**

**[ichalmers@jameslind.net](mailto:ichalmers@jameslind.net)**

1  
2  
3  
4  
5  
6  
7  
8  
9  
10  
11  
12  
13  
14  
15  
16  
17  
18  
19  
20  
21  
22  
23  
24  
25  
26  
27  
28  
29  
30  
31  
32  
33  
34  
35  
36  
37  
38  
39  
40  
41  
42  
43  
44  
45  
46  
47  
48  
49  
50  
51  
52  
53  
54  
55  
56  
57  
58  
59  
60

Iain Chalmers  
Coordinator, James Lind Initiative  
Summertown Pavilion  
Middle Way  
Oxford OX2 7LG, UK

Sarah Rosenbaum  
[Sarah.rosenbaum@fhi.no](mailto:Sarah.rosenbaum@fhi.no)  
Norwegian Institute of Public Health  
BOKS 7004 St.Olavsplass  
0130 Oslo, Norway

Øystein Guttersrud  
[oystein.guttersrud@naturfagsenteret.no](mailto:oystein.guttersrud@naturfagsenteret.no)  
Norwegian Centre for Science Education, University of Oslo  
Postboks 1106, Blindern 0317 Oslo, Norway

**Keywords: evidence based medicine, shared decision making, health literacy, outcome measurement, multiple-choice, patient education**

## Abstract

**Objectives:** To describe the development of the Claim Evaluation Tools, a set of flexible items to measure people's ability to assess claims about treatment effects.

**Setting:** Methodologists and members of the community (including children) in Uganda, Rwanda, Kenya, Norway, United Kingdom and Australia.

**Participants:** In the iterative development of the items we used purposeful sampling of people with training in research methodology, such as teachers of evidence based medicine, as well as patients and members of the public from both low and high-income countries. Development consisted of four processes: (1) determining the scope of the Claim Evaluation Tools and development of items; (2) expert item review and feedback (n=63); (3) cognitive interviews with children and adult end-users (n=109); and (4) piloting and administrative tests (n=956).

**Results:** The Claim Evaluation Tools database currently includes a battery of multiple-choice items. Each item begins with a scenario intended to be relevant across contexts, and which can be used for children (from 10 years old and above), adult members of the public, and health professionals. People with expertise in research methods judged the items to have face validity, and end-users judged them relevant and acceptable in their settings. In response to feedback from methodologists and end-users, we simplified some text, explained terms where needed, and redesigned formats and instructions.

### Conclusion:

The Claim Evaluation Tools database is a flexible resource from which researchers, teachers and others can design measurement instruments to meet their own requirements. These evaluation tools are being managed and made freely available for non-commercial use (on request) through Testing Treatments *interactive* ([testingtreatments.org](http://testingtreatments.org)).

## Strengths and limitations of this study

- As far as we are aware, this is the first attempt to develop a set of evaluation tools that objectively measure people's ability to assess treatment claims
- This development resulted from collaboration among researchers in high and low income countries, and included feedback from people with methodological expertise as well as members of the public
- Based on qualitative and quantitative feedback, the Claim Evaluation Tools were found to have face validity and relevance in the contexts studied
- There are many ways of developing evaluation instruments. We chose to use a pragmatic and iterative approach, but the reliability of the items remains to be tested.

For peer review only

## Background

There are endless claims about the effects of treatments in the mass media, advertisements and everyday personal communication (1-4). Such claims may include strategies to prevent illness, such as changes in health behaviour or screening; therapeutic interventions; or public health and system interventions. Many claims are unsubstantiated, and patients and professionals alike may neither know whether the claims are true or false, nor have the necessary skills or tools to assess their reliability (5-11). As a result, people who believe and act on unvalidated claims may suffer by doing things that can be harmful, and by not doing things that can help. Either way, personal and societal resources for health care will be wasted (12).

The Informed Health Choices (IHC) project aims to support the use of research evidence by patients and the public, policymakers, journalists and health professionals. The multidisciplinary group responsible for the project includes researchers in six countries - Norway, Uganda, Kenya, Rwanda, United Kingdom and Australia. The project is funded by the Research Council of Norway. It has been responsible for developing educational resources for schoolchildren and their parents in Uganda, with the objective of improving their ability to assess claims about treatment effects (13, 14). Evaluation of the effects of these educational resources is taking place in two randomised trials (the IHC trials) in 2016 and 2017.

As our starting point for developing these educational interventions, the IHC group began by developing a list of key concepts that people need to understand to assess claims about treatment effects (15). The generation of this list was done by using the second edition of the book "Testing Treatments"; by doing a literature review to identify key concepts; and by reviewing critical appraisal tools for the public, journalists and health professionals (11, 15). The list of concepts (Table 1) that emerged from this process was revised iteratively, based on feedback from members of the project team and the IHC advisory group. The latter includes researchers, journalists, teachers and others with expertise in health literacy, and in teaching or communicating evidence-based health care (15). The resulting set list of concepts serves as a syllabus or curriculum from which researchers, teachers and others may develop interventions. It is an evolving document hosted by [testingtreatments.org](http://testingtreatments.org). The list will be subject to annual review to allow for revisions of existing concepts or identification and inclusion of additional concepts. For the remainder of this paper, we will refer to these as Key Concepts.

In our search for appropriate outcome measures for the IHC randomized trials, we conducted a systematic mapping review of interventions and outcome measures used for evaluating understanding of one or more of the Key Concepts (16). Based on the findings of this review, we concluded that the procedures and instruments available covered only a handful of the Key Concepts we had identified, and were not suitable for our purposes (16). Accordingly, we set out to develop the Claim Evaluation Tools to serve as the primary outcome measure of the IHC randomized trials evaluating the effects of the educational resources.

Although our primary target groups were children and adults in Uganda, we wanted to create a set of tools - a database - which would be relevant in other settings. Four important elements underpinned the development of the Claim Evaluation Tools. These tools should (i) measure objectively people's ability to apply the Key Concepts (i.e not rely on self-assessment of own abilities); (ii) be flexible and easily adaptable to particular populations or purposes; (iii) be rigorously evaluated; and (iv) be freely available for non-commercial use by others interested in mapping or evaluating people's ability to apply some or all of the Key Concepts.

Table 1. Short list of Key Concepts that people need to understand to assess claims about treatment effects

| <b>Informed Health Choices Concepts</b>                                                                                                                                |
|------------------------------------------------------------------------------------------------------------------------------------------------------------------------|
| <b>1. Recognising the need for fair comparisons of treatments</b><br><i>[Fair treatment comparisons are needed]</i>                                                    |
| 1.1 Treatments may be harmful<br><i>[Treatments can harm]</i>                                                                                                          |
| 1.2 Personal experiences or anecdotes (stories) are an unreliable basis for determining the effects of most treatments<br><i>[Anecdotes are not reliable evidence]</i> |
| 1.3 A treatment outcome may be associated with a treatment, but not caused by the treatment<br><i>[Association is not necessarily causation]</i>                       |
| 1.4 Widely used or traditional treatments are not necessarily beneficial or safe<br><i>[Practice is often not based on evidence]</i>                                   |



1  
2  
3  
4  
5  
6  
7  
8  
9  
10  
11  
12  
13  
14  
15  
16  
17  
18  
19  
20  
21  
22  
23  
24  
25  
26  
27  
28  
29  
30  
31  
32  
33  
34  
35  
36  
37  
38  
39  
40  
41  
42  
43  
44  
45  
46  
47  
48  
49  
50  
51  
52  
53  
54  
55  
56  
57  
58  
59  
60

|                                                                                                                                                                                  |
|----------------------------------------------------------------------------------------------------------------------------------------------------------------------------------|
| 1.5 New, brand-named, or more expensive treatments may not be better than available alternatives<br><i>[New treatments are not always better]</i>                                |
| 1.6 Opinions of experts or authorities do not alone provide a reliable basis for deciding on the benefits and harms of treatments<br><i>[Expert opinion is not always right]</i> |
| 1.7 Conflicting interests may result in misleading claims about the effects of treatments<br><i>[Be aware of conflicts of interest]</i>                                          |
| 1.8 Increasing the amount of a treatment does not necessarily increase the benefits of a treatment and may cause harm<br><i>[More is not necessarily better]</i>                 |
| 1.9 Earlier detection of disease is not necessarily better<br><i>[Earlier is not necessarily better]</i>                                                                         |
| 1.10 Hope can lead to unrealistic expectations about the effects of treatments<br><i>[Avoid unrealistic expectations]</i>                                                        |
| 1.11 Beliefs about how treatments work are not reliable predictors of the actual effects of treatments<br><i>[Theories about treatment can be wrong]</i>                         |
| 1.12 Large, dramatic effects of treatments are rare<br><i>[Dramatic treatment effects are rare]</i>                                                                              |
|                                                                                                                                                                                  |
| 2. Judging whether a comparison of treatments is a fair comparison<br><i>[Treatment comparisons should be fair]</i>                                                              |
| 2.1 Evaluating the effects of treatments requires appropriate comparisons<br><i>[Treatment comparisons are necessary]</i>                                                        |
| 2.2 Apart from the treatments being compared, the comparison groups need to be similar (i.e. 'like needs to be compared with like')<br><i>[Compare like with like]</i>           |
| 2.3 People's experiences should be counted in the group to which they were allocated<br><i>[Base analyses on allocated treatment]</i>                                            |
| 2.4 People in the groups being compared need to be cared for similarly (apart from the treatments being compared)<br><i>[Treat comparison groups similarly]</i>                  |
| 2.5 If possible, people should not know which of the treatments being compared they are receiving<br><i>[Blind participants to their treatments]</i>                             |

|    |                                                                                                                                                                      |
|----|----------------------------------------------------------------------------------------------------------------------------------------------------------------------|
| 1  |                                                                                                                                                                      |
| 2  |                                                                                                                                                                      |
| 3  |                                                                                                                                                                      |
| 4  | 2.6 Outcomes should be measured in the same way (fairly) in the treatment groups being compared                                                                      |
| 5  | <i>[Assess outcome measures fairly]</i>                                                                                                                              |
| 6  |                                                                                                                                                                      |
| 7  |                                                                                                                                                                      |
| 8  | 2.7 It is important to measure outcomes in everyone who was included in the treatment comparison groups                                                              |
| 9  | <i>[Follow up everyone included]</i>                                                                                                                                 |
| 10 |                                                                                                                                                                      |
| 11 |                                                                                                                                                                      |
| 12 |                                                                                                                                                                      |
| 13 |                                                                                                                                                                      |
| 14 | <b>3. Understanding the role of chance</b>                                                                                                                           |
| 15 | <i>[Understand the role of chance]</i>                                                                                                                               |
| 16 |                                                                                                                                                                      |
| 17 |                                                                                                                                                                      |
| 18 | 3.1 Small studies in which few outcome events occur are usually not informative and the results may be misleading                                                    |
| 19 | <i>[Small studies may be misleading]</i>                                                                                                                             |
| 20 |                                                                                                                                                                      |
| 21 |                                                                                                                                                                      |
| 22 | 3.2 The use of p-values to indicate the probability of something having occurred by chance may be misleading; confidence intervals are more informative              |
| 23 | <i>[P-values alone can be misleading]</i>                                                                                                                            |
| 24 |                                                                                                                                                                      |
| 25 |                                                                                                                                                                      |
| 26 | 3.3 Saying that a difference is statistically significant or that it is not statistically significant can be misleading                                              |
| 27 | <i>['Significance' may be misleading]</i>                                                                                                                            |
| 28 |                                                                                                                                                                      |
| 29 |                                                                                                                                                                      |
| 30 |                                                                                                                                                                      |
| 31 |                                                                                                                                                                      |
| 32 | <b>4. Considering all of the relevant fair comparisons</b>                                                                                                           |
| 33 | <i>[Consider all the relevant evidence]</i>                                                                                                                          |
| 34 |                                                                                                                                                                      |
| 35 |                                                                                                                                                                      |
| 36 | 4.1 The results of single tests of treatments can be misleading                                                                                                      |
| 37 | <i>[Single studies can be misleading]</i>                                                                                                                            |
| 38 |                                                                                                                                                                      |
| 39 |                                                                                                                                                                      |
| 40 | 4.2 Reviews of treatment tests that do not use systematic methods can be misleading                                                                                  |
| 41 | <i>[Unsystematic reviews can mislead]</i>                                                                                                                            |
| 42 |                                                                                                                                                                      |
| 43 | 4.3 Well done systematic reviews often reveal a lack of relevant evidence, but they provide the best basis for making judgements about the certainty of the evidence |
| 44 | <i>[Consider how certain the evidence is]</i>                                                                                                                        |
| 45 |                                                                                                                                                                      |
| 46 |                                                                                                                                                                      |
| 47 |                                                                                                                                                                      |
| 48 |                                                                                                                                                                      |
| 49 | <b>5. Understanding the results of fair comparisons of treatments</b>                                                                                                |
| 50 | <i>[Understand the results of comparisons]</i>                                                                                                                       |
| 51 |                                                                                                                                                                      |
| 52 |                                                                                                                                                                      |
| 53 | 5.1 Treatments may have beneficial and harmful effects                                                                                                               |
| 54 | <i>[Weigh benefits and harms of treatment]</i>                                                                                                                       |
| 55 |                                                                                                                                                                      |
| 56 |                                                                                                                                                                      |
| 57 |                                                                                                                                                                      |
| 58 |                                                                                                                                                                      |
| 59 |                                                                                                                                                                      |
| 60 |                                                                                                                                                                      |

1  
2  
3  
4  
5  
6  
7  
8  
9  
10  
11  
12  
13  
14  
15  
16  
17  
18  
19  
20  
21  
22  
23  
24  
25  
26  
27  
28  
29  
30  
31  
32  
33  
34  
35  
36  
37  
38  
39  
40  
41  
42  
43  
44  
45  
46  
47  
48  
49  
50  
51  
52  
53  
54  
55  
56  
57  
58  
59  
60

|                                                                                                                                                      |
|------------------------------------------------------------------------------------------------------------------------------------------------------|
| 5.2 Relative effects of treatments alone can be misleading<br><i>[Relative effects can be misleading]</i>                                            |
| 5.3 Average differences between treatments can be misleading<br><i>[Average differences can be misleading]</i>                                       |
| <b>6. Judging whether fair comparisons of treatments are relevant</b><br><i>[Judge relevance of fair comparisons]</i>                                |
| 6.1 Fair comparisons of treatments should measure outcomes that are important<br><i>[Outcomes studied may not be relevant]</i>                       |
| 6.2 Fair comparisons of treatments in animals or highly selected groups of people may not be relevant<br><i>[People studied may not be relevant]</i> |
| 6.3 The treatments evaluated in fair comparisons may not be relevant or applicable<br><i>[Treatments used may not be relevant]</i>                   |
| 6.4 Results for a selected group of people within fair comparisons can be misleading<br><i>[Beware of subgroup analyses]</i>                         |

## Objective

To describe the development of the Claim Evaluation Tools, a set of flexible tools to measure people's ability to assess claims about treatment effects.

## Methods

The development of the Claim Evaluation Tools included four processes, using qualitative and quantitative methods, over three years (2013-2016). These phases were: (i) determining the scope of the Claim Evaluation Tools and development of items; (ii) an expert item review and feedback (face validity); (iii) cognitive interviews with end-users - including children, parents, teachers and patient representatives - to assess relevance, understanding and acceptability; and (iv) piloting and practical administrative tests of the items in different contexts. For clarity, we have described the methods and findings of each of these processes separately. However, development was iterative, with the different processes overlapping and feeding into each other. Researchers affiliated with the IHC project in six countries (Uganda, Norway, Rwanda, Kenya, UK and Australia) contributed to the development of the

1  
2  
3 Claim Evaluation Tools. An overview of the development process is presented in Figure 1. The roles and  
4 purposes of the different research teams are described below.  
5  
6  
7

8  
9 *Please enter Figure 1. Overview and timeline of the development process*  
10

### 11 **Development of items**

12 The Claim Evaluation Tools working group, with members of the IHC group from Norway, UK and  
13 Uganda (AA, AO, IC, DS, AN), had principal responsibility for agreeing on content, including the  
14 instructions and wording of individual items. The team in Norway (AA and AO) coordinated the  
15 development and evaluations. The scope of the Claim Evaluation Tools was based on the list of Key  
16 Concepts (15)(see table 1).  
17  
18  
19  
20  
21  
22  
23

24 Our vision for the Claim Evaluation Tools was that they should not be a standard, fixed questionnaire,  
25 but rather a flexible tool-set including a battery of items, of which some may be more or less relevant to  
26 certain populations or purposes. For example, a teacher developing a series of lectures targeting five of  
27 the concepts in the Key Concept list, could design her own evaluation instrument to test her students by  
28 picking items from the database that specifically addressed those Key Concepts.  
29  
30  
31  
32  
33

34 Multiple-choice items are well suited for assessing application of knowledge, interpretation and  
35 judgements. In addition, they help problem-based learning and practical decision making (17). Each of  
36 the items we created opened with a scenario leading to a treatment claim and a question, followed by a  
37 choice of answers. We developed the items using two multiple-choice formats - single multiple-choice  
38 items (addressing one concept), and multiple true-false items (addressing several concepts in the same  
39 item). We developed all items with “one-best answer” response options (17), the options being placed  
40 on a continuum, with one answer being unambiguously the “best” and the remaining options as “worse”.  
41 We developed all items in English.  
42  
43  
44  
45  
46  
47  
48

49 The initial target groups for the Claim Evaluation Tools were fifth grade children (10 to 12 year-olds in  
50 the next to last year of primary school) and adults (parents of primary school children) in Uganda.  
51 However, throughout the development process, our goal was to create a set of tools that we hoped  
52 would be relevant in other settings. Accordingly, we used conditions and treatments that we judged  
53  
54  
55  
56  
57  
58  
59  
60

1  
2  
3 likely to be relevant across different country contexts. Where necessary, we explained the conditions  
4 and treatments used in the opening scenarios. We also decided to avoid conditions and treatments that  
5 might lead the respondents to focus on the specific treatments (about which they might have an opinion  
6 or prior knowledge), rather than on the concepts.  
7  
8  
9

### 10 11 **Exploring relevance, understanding and acceptability of items**

12 In order to get feedback on the relevance, understanding and acceptability of items, we used purposeful  
13 sampling of people with expertise in the Key Concepts, as well as patients and members of the public  
14 from both low and high-income countries (18-21).  
15  
16  
17

### 18 19 ***Item review and feedback by methodologists (face validity)***

20 First, we circulated the complete set of multiple-choice items to members of the IHC advisory group and  
21 asked them to comment on their face validity and applicability as judged against the list of Key Concepts.  
22 Each advisory group member was assigned a set of three concepts, with associated items. A feedback  
23 form asked them to indicate to what extent they felt each item addressed the relevant Key Concept  
24 using the response options “Yes”, “No” or “Uncertain”, together with any open-ended comments. Any  
25 items that were tagged as “No” or “Uncertain” by one or more of those consulted were considered for  
26 revision.  
27  
28  
29  
30  
31  
32  
33  
34  
35

36 On two occasions, we also invited four methodologists associated with the Norwegian research group  
37 and with expertise in the concepts to respond to the full set of items. These experts were not involved in  
38 the project or the development of the Claim Evaluation Tools. In this element of the evaluation, the  
39 response options were randomised and the methodologists were blinded to the correct answers. They  
40 were asked to choose what they judged to be the best answer to each item’s question, and were  
41 encouraged to provide open-ended comments and flag any problems they identified. Any item in which  
42 one or more of the methodologists failed to identify the ‘best answer’ was considered for potential  
43 revision.  
44  
45  
46  
47  
48  
49  
50

51 We also invited people with expertise in the Key Concepts from all project partner countries to provide  
52 feedback on several occasions throughout the development of the tools. In addition to providing general  
53  
54  
55  
56  
57  
58  
59  
60

1  
2  
3 feedback, an important purpose of reviewing the items in these different contexts was to identify any  
4 terminology and examples (conditions and treatments) that might be culturally inappropriate.

5  
6 For all of this feedback, suggested revisions and areas of improvement were summarised in an Excel  
7 worksheet in two categories: (i) comments of a general nature relating to all items, such as choice of  
8 terminology or format; and (ii) comments associated with specific items.  
9  
10  
11

### 12 13 ***Cognitive interviews with end-users on relevance of examples, understanding and acceptability***

14  
15 After the Claim Evaluation Tools working group and the IHC project group agreed on the instrument  
16 content, we undertook cognitive interviews with individuals from our potential target groups in Uganda,  
17 Australia, UK and Norway (22-24). Country representatives of the IHC project group recruited  
18 participants in their own contexts, based on purposeful sampling, in consultation with the Norwegian  
19 coordinator (AA). Since Uganda has been the principal focus of our interest, this was always our starting  
20 and ending point. In total, four rounds of interviews took place in Uganda. We organised interviews in  
21 Norway, UK and Australia to assess relevance within those settings. We used these interviews to obtain  
22 feedback from potential end-users on the relevance of the scenarios (such as the conditions and  
23 treatments used in the examples), and the intelligibility and acceptability of the scenarios, formats and  
24 instructions. This was particularly important because we intended to use the items for testing children  
25 as well as adults. Throughout this process, we also piloted and user-tested several versions of the items  
26 (designs and instructions). Failure to address these issues when developing the items might increase the  
27 likelihood of missing responses, “guessing”, or other measurement errors. For example, we wanted to  
28 minimise the influence of people’s cultural background on how they responded to the multiple-choice  
29 items. The effects of such confounders have been addressed in the final phase of development using  
30 psychometric testing and Rasch analysis of the questionnaire (25). The interviews were intended to help  
31 prevent problems resulting from confounders relatively early in the evaluation process.  
32  
33  
34  
35  
36  
37  
38  
39  
40  
41  
42  
43  
44  
45

46  
47 Our interviews were done iteratively between October 2014 and January 2016, allowing for changes to  
48 the items between interviews. All our interviews used a semi-structured interview guide (Appendix 1)  
49 inspired by previous research (22-24). As part of the interviews, participants were given a sample set of  
50 the multiple-choice items and asked to respond to these. The interviews addressed questions raised  
51 during development of the items about the format of questions or the terminology used in the  
52 questions. In response, we revised the interview guide and changed the multiple-choice items when  
53  
54  
55  
56  
57  
58  
59  
60

1  
2  
3 relevant. When conducting the interviews, we used the methods of ‘think aloud’ and ‘verbal probing’,  
4 two approaches to cognitive interviewing (23). With “think aloud” the respondent is asked to explain  
5 how they arrived at their response to each item. Such interviews are less prone to bias because of the  
6 more limited role of the interviewer. However, some respondents have difficulty in verbalising their  
7 thought processes, and in these circumstances we followed up with “verbal probing”, which uses  
8 questions that the interviewer asks after the respondent has completed each of the items. Following  
9 each item, the interviewer began with the “think aloud” method by asking respondents how they  
10 arrived at their response before asking more specific questions, as necessary. We audio recorded  
11 interviews when possible, and we aimed to have two people doing the interviews (with one person  
12 taking notes and the other person being the lead-interviewer). For practical reasons this was not always  
13 possible. Each country representative summarised the key points from the interviews. Suggested  
14 revisions and areas of improvement were fed back to the Norwegian coordinator who entered these  
15 into the same Excel spreadsheet, as also the feedback from the methodologists.  
16  
17  
18  
19  
20  
21  
22  
23  
24  
25  
26

### ***Piloting of sample sets of Claim Evaluation Tools***

27  
28 We conducted five small pilots in which we administered sample sets of the Claim Evaluation Tools to  
29 our target groups. As previously stated, the Key Concept list serves as a syllabus or curriculum from  
30 which researchers, teachers and others may develop interventions. Likewise, we developed the Claim  
31 Evaluation Tools so that researchers and others can pick items that are relevant for their purposes. In  
32 other words, they can design their own instrument.  
33  
34  
35  
36  
37  
38

39 The IHC interventions were initially developed to target 22 Key Concepts that were prioritized as most  
40 relevant for our target populations in Uganda. We have developed two instruments addressing the 22  
41 Key Concepts targeted by the IHC interventions by selecting relevant items from the Claim Evaluation  
42 Tools database. For the pilots reported in this paper we included items that were relevant for the IHC  
43 trials, both to test how sample sets of Claim Evaluation Tools would work in a practical setting, but also  
44 to obtain an indication of the sample sizes required for the randomized trials.  
45  
46  
47  
48  
49  
50

51 The first pilot (March-April 2015) was an administrative test in a primary school in Uganda. This involved  
52 a group of children who had taken part in a pilot of the IHC primary school resources as part of the IHC  
53 project, and a comparison group of children who had not received training in the Key Concepts (in total  
54  
55  
56  
57  
58  
59  
60

1  
2  
3 169 children). We included all items addressing the 22 Key Concepts. Because of the large number of  
4 items to be tested, we divided them into four sample set questionnaires. We designed these  
5 questionnaires to be similar to the questionnaires to be used in the IHC trials. This would provide us  
6 with some feedback on how administrating a set of the Claim Evaluation Tools would work in practice, in  
7 a classroom setting. We also wanted to explore potential problems with incorrectly completed  
8 responses (through visual inspection of the responses).  
9  
10  
11  
12  
13

14  
15 The second pilot (September to December 2015) focused solely on format testing. Three different sets  
16 of formats were tested, but with the same items addressing 22 of the 32 Key Concepts kept constant  
17 across the three formats. We designed the formats based on lessons learned from the feedback from  
18 methodologists, interviews with end-users, and through visual inspection of the data collected in the  
19 first pilot. We recruited people in Uganda, Rwanda and Kenya to do this (N=204), using purposeful  
20 sampling of children and adults. The outcome of this test was the number of missing or incorrectly  
21 completed responses per item.  
22  
23  
24  
25  
26  
27

28  
29 The third, fourth and fifth pilots had two objectives. The first was to compare the ability of people who  
30 had and had not received training to apply the Key Concepts. This provided an indication of the sample  
31 sizes that would be needed for the IHC randomised trials. The second objective was to estimate the  
32 frequency of missing responses as an indication of problems with understanding the item's instructions.  
33 For these purposes, we used one sample set of the Claim Evaluation Tools (addressing the 22 basic  
34 concepts). In these pilots, we also observed the time required to complete a sample set of the  
35 questionnaire. To fit an evaluation using the Claim Evaluation Tool in a busy school day as part of the IHC  
36 intervention, we hoped that it would be possible to complete a sample set questionnaire within an hour.  
37  
38  
39  
40  
41  
42  
43  
44

45 The third pilot (October to November 2015) and fourth pilot (November to December 2015) were  
46 conducted with Ugandan primary school children (in two schools) and their parents. The fifth pilot  
47 (December 2015) took place in Norway and included primary school children in one school. In all three  
48 of these pilots, we recruited children and parents who had taken part in piloting IHC primary school  
49 materials and podcast, respectively, and children and parents who had received no such intervention. In  
50 total, 197 children took part in the Ugandan school pilot, 301 parents took part in the podcast pilot, and  
51 85 children took part in the Norwegian school pilot. The results of these pilots were summarised by  
52  
53  
54  
55  
56  
57  
58  
59  
60



calculating mean correct responses to all items addressing the same concept. We also calculated missing responses per item.

## Results

We present the results thematically, beginning with the development of items, and the subsequent issues that were explored as part of the development process; judgement of relevance of the items to the Key Concepts (face validity); understanding and perceived difficulty of content; preference and understanding of instructions (formats); timing; and correct responses. An overview of the sources of feedback we used to explore these themes, our main findings and our revisions is shown in table 2.

Table 2. Overview of main findings and decisions about revisions, by theme

| Theme                                                      | Type of feedback                                                                                                                                            | Findings                                                                                                                                                                                                                                                                   | Revisions                                                                                                                                                                               |
|------------------------------------------------------------|-------------------------------------------------------------------------------------------------------------------------------------------------------------|----------------------------------------------------------------------------------------------------------------------------------------------------------------------------------------------------------------------------------------------------------------------------|-----------------------------------------------------------------------------------------------------------------------------------------------------------------------------------------|
| Relevance of the items to the Key Concepts (face validity) | <ul style="list-style-type: none"> <li>Methodologists and people with expertise in the Key Concepts</li> </ul>                                              | <ul style="list-style-type: none"> <li>Most items were judged as relevant.</li> </ul>                                                                                                                                                                                      | <ul style="list-style-type: none"> <li>Minor revisions, items that were found to be partly relevant (20) or not relevant (1) was considered by the working group</li> </ul>             |
| Understanding and perceived difficulty of content          | <ul style="list-style-type: none"> <li>Methodologists and people with expertise in the Key Concepts</li> <li>Cognitive interviews with end-users</li> </ul> | <ul style="list-style-type: none"> <li>The 'distance' between the "best" option and the "worse" options was considered too small</li> <li>Low literacy skills in the target audience raised as a concern</li> <li>Certain terminology identified as problematic</li> </ul> | <ul style="list-style-type: none"> <li>The worse options made more "wrong"</li> <li>Reduction of text</li> <li>Adding explanations of terminology and rewriting of scenarios</li> </ul> |
| Preference and understanding                               | <ul style="list-style-type: none"> <li>Cognitive interviews with end-users</li> </ul>                                                                       | <ul style="list-style-type: none"> <li>A mix of the simple-multiple choice and multiple true-false</li> </ul>                                                                                                                                                              | <ul style="list-style-type: none"> <li>Redesign of formats and instructions to</li> </ul>                                                                                               |

|                              |                                                                                                                        |                                                                                                                                                                                                                                                                                                    |                                                                                                                                  |
|------------------------------|------------------------------------------------------------------------------------------------------------------------|----------------------------------------------------------------------------------------------------------------------------------------------------------------------------------------------------------------------------------------------------------------------------------------------------|----------------------------------------------------------------------------------------------------------------------------------|
| of instructions (formats)    | <ul style="list-style-type: none"> <li>Piloting of sample sets of the Claim Evaluation Tool (pilots 1 to 5)</li> </ul> | <p>formats preferred</p> <ul style="list-style-type: none"> <li>Formats acceptable and recognizable</li> <li>Misunderstandings of instructions; open-answers provided and checking of multiple check-boxes</li> </ul>                                                                              | <p>remove unnecessary open spaces, avoiding use of multiple check-boxes, and the use of grids in multiple true-false options</p> |
| Timing and correct responses | <ul style="list-style-type: none"> <li>Piloting of sample sets of the Claim Evaluation Tool (pilots 3 to 5)</li> </ul> | <ul style="list-style-type: none"> <li>30 to 60 minutes to complete a questionnaire that included demographic questions and a sample of 29 items</li> <li>Participants who had taken part in piloting of the IHC resources did slightly better than others for most of the Key Concepts</li> </ul> | <ul style="list-style-type: none"> <li>No revisions</li> </ul>                                                                   |

### Development of items

We developed items using two formats, with several items to address each Key Concept. The single multiple-choice items address only one Key Concept within each item; the multiple true-false items include questions that relate to three or more Key Concepts. The two different formats are shown in figure 2. We created an initial batch of 4-6 items addressing each Key Concept. Because we did not know which formats would be preferred by end-users, or which items would have the best psychometric properties, this allowed us to remove items based on feedback from experts, end-users and through the final psychometric testing and Rasch analysis (25).

*Please enter Figure 2. Example of formats*

### Exploring relevance (face validity)

Judgements about the relevance of items to the Key Concepts was made by methodologists and people with expertise in the Key Concepts. The first phase included feedback from our advisory group: thirteen members provided feedback on 135 items. Only one of these items was judged to have addressed the

1  
2  
3 concept inadequately; a further 20 items were deemed to be only partly relevant. The relevance of the  
4 items was confirmed in the test-run with the Norwegian research group using the four invited  
5 methodologists, as well as by people with expertise in the Key Concepts from the project partner  
6 countries.  
7  
8  
9

### 10 11 **Understanding and perceived difficulty of content**

12 Understanding of formats and acceptability was explored by consulting methodologists and other  
13 people with expertise in the Key Concepts, as well as through cognitive interviews with end-users.  
14 Although the items were judged to be relevant, an important element of the feedback from the test-run  
15 was that the 'distance' between the "best" option and the "worse" options was considered too small,  
16 with the result that the judgements required were too difficult. Based on this feedback, we revised the  
17 "worse" options to make them more "wrong".  
18  
19  
20  
21  
22  
23

24  
25  
26 The cognitive interviews with members of our target group also suggested that the items were too 'text  
27 heavy', and needed to be simplified. Experts and end-users in Uganda also felt that low literacy might  
28 also be a barrier. Consequently, we tried hard to make the scenarios as simple as possible without losing  
29 key content.  
30  
31  
32

33  
34 The end-users and the methodologists consulted in each country (Uganda, Kenya, Rwanda, UK, and  
35 Australia), also provided comments on terminology, as well as those scenarios that they felt might not  
36 be appropriate or would need to be explained. The Claim Evaluation Tools working group considered  
37 these comments and revised the items. When we were unable to avoid using certain terms (for example,  
38 "research study"), we added explanations. Our rationale was that some terms would present a barrier to  
39 understanding the items, but were not considered to be part of the learning objectives associated with  
40 the Key Concepts. For some other terms, we used alternatives deemed acceptable by researchers, other  
41 experts and members of the target groups in each country (Uganda, Kenya, Rwanda, UK, Australia and  
42 Norway). This process involved feeding back all changes to experts and end-users in an iterative process  
43 with continuous revisions.  
44  
45  
46  
47  
48  
49  
50  
51

### 52 53 ***Preference and understanding of instructions (formats)***

1  
2  
3 An iterative process of cognitive interviews and piloting the items using sample questionnaires informed  
4 the design and formats of the instructions. Our interviews with end-users were to obtain their  
5 preferences on format, to follow the steps of their reasoning when responding to the items, and to  
6 assess their understanding of the items' instructions. The main message was that people preferred a mix  
7 of the simple-multiple choice and multiple true-false formats to make the questionnaire more  
8 interesting. The items were otherwise well received. The general feedback from all the different country  
9 settings was that the formats were acceptable, recognisable and similar to multiple-choice formats they  
10 had encountered in other settings.  
11  
12

13  
14  
15  
16  
17  
18  
19 Based on verbal feedback in the interviews with the end-users, as well as visual inspection of how  
20 people responded to the items in the five pilots, we identified two potential problems. The first was that  
21 respondents tended to provide open-ended responses to the questions; the second was that people  
22 tended to tick more than one check-box. Because of these problems, the mean missing/ incorrectly  
23 completed responses in the first school pilot in Uganda (March- April 2015) was 20-40%. Examples of  
24 such incorrectly completed multiple-choice items from this first pilot are shown in Figure 3.  
25  
26  
27  
28  
29

30  
31 *Please enter Figure 3. Examples of incorrectly completed multiple-choice questions*  
32  
33

34 We tested revised designs (Figure 2) in the second pilot in Uganda, Rwanda and Kenya (September to  
35 December 2015). This greatly improved people's responses to the questionnaire, reducing missing or  
36 incorrectly completed responses to less than 4% of the items. Based on this pilot, we made final  
37 revisions and decided on the formats to be used in the subsequent pilots.  
38  
39  
40  
41

42  
43 Figure 2 shows the design changes we used to avoid these problems. These included removing blank  
44 spaces, which could be misinterpreted as inviting open (free text) responses; and avoiding use of  
45 multiple check boxes for "one-best answer" formats. For the multiple true-false formats, response  
46 options using an open grid design, with instructions at the top, resulted in fewer problems.  
47  
48  
49  
50

51  
52 The third, fourth and fifth pilots, conducted in Uganda and Norway (October to December 2015),  
53 confirmed the appropriateness of the formats, and missing or incorrectly completed responses were less  
54 than 2%. These pilots also confirmed that respondents took between 30 and 60 minutes to complete a  
55  
56  
57  
58

1  
2  
3 questionnaire that included demographic questions and a sample of 29 items. The participants' correct  
4 responses per Key Concept are shown in Figure 4. This figure, in which correct answers are plotted for  
5 each Key Concept per group, shows that participants who had taken part in piloting the IHC resources  
6 were slightly more likely than others to give correct answers for most of the Key Concepts.  
7  
8  
9

10  
11  
12 *Please enter Figure 4. Distribution of correct answers in pilots*  
13

## 14 15 **Discussion**

16  
17 Developing a new evaluation instrument is not straightforward, and requires rigorous testing using  
18 qualitative and quantitative methods (26). There are many ways of doing this. We chose to use a  
19 pragmatic and iterative approach, involving feedback from experts and end-users and continuous  
20 revisions. This development work was possible because we are a multidisciplinary, international  
21 collaboration including people from high and low-income countries. Despite differences between  
22 countries, enabling people to assess treatment claims in their daily lives is a challenge in all countries.  
23  
24  
25  
26  
27

28  
29 We developed a battery of multiple-choice items using two formats, with several items addressing each  
30 Key Concept. An international group of people with relevant expertise considered that the items we  
31 developed addressed the Key Concepts we had identified appropriately, and end-users considered the  
32 items to be acceptable in their settings. Methodologists and end-users suggested that some items were  
33 too difficult, so we revised the answer options, reduced the amount of text used, and explained  
34 terminology if necessary. Based on feedback from the interviews with end-users, the revised formats  
35 were well received, but the piloting also identified issues with understanding of instructions. We  
36 addressed these problems by further testing and redesign of instructions and formats. This resulted in a  
37 reduction of missing or incorrectly completed responses in subsequent pilots. Piloting of sample sets of  
38 Claim Evaluation Tools also confirmed that it was possible to complete a questionnaire with 29 items  
39 within an hour, and that people who had received training in the Key Concepts did slightly better than  
40 those who had not received such training.  
41  
42  
43  
44  
45  
46  
47  
48  
49  
50

51  
52 The relevance of the items outside the contexts studied as part of this project is unclear. Feedback from  
53 end-users in other settings may be different. Researchers or teachers who would like to use the Claim  
54 Evaluation Tools in their contexts should consider the relevance of terminology and the examples used,  
55  
56  
57

1  
2  
3 involving end-users if possible. It should also be noted that the first phases in the development  
4 described in this paper did not include any evaluations of the reliability of the items. This requires  
5 rigorous psychometric testing including Rasch analysis, and is described in a separate paper (25).  
6  
7  
8  
9

10 This paper describes the development and initial steps of validation of items addressing all 32 of the Key  
11 Concepts, in four phases. However, in the last phase, we also did some pilot testing of items referring  
12 specifically to 22 of the 32 Key Concepts. There were several objectives of these pilots, but for  
13 development purposes, we wanted to do practical administrative tests to explore the understanding of  
14 formats and timing of Claim Evaluation Tools “sample tests”. A limitation of these pilots is that people  
15 may respond differently to the items addressing the 10 Key Concepts not included, in terms of number  
16 of missing responses, incorrectly filled in questions, or in time to completion. We judge this to be of little  
17 importance as the items addressing these two “groups” of Key Concepts use the same formats and are  
18 similar in length and language.  
19  
20  
21  
22  
23  
24  
25  
26

27 As our first step in the choice of outcome measurement for the IHC trials, we conducted a systematic  
28 mapping review of interventions and outcome measures used for evaluating one or more of the Key  
29 Concepts (16). Our findings suggested that research on the Key Concepts is of interdisciplinary interest,  
30 and that a variety of assessment tools exists. However, none of the identified tools addressed more than  
31 15 Key Concepts. The most relevant of these were instruments designed to assess competency in  
32 evidence-based medicine, The Fresno test by Ramos and colleagues (2003) (27), and an instrument  
33 developed by Godwin and colleagues (2003) (28). Assessment tools used in studies targeting patients or  
34 consumers included only seven or fewer Key Concepts. The large majority of these generally only  
35 touched on one concept - 5.1 “Weigh benefits and harms of treatment” (29). The Claim Evaluation Tools  
36 were developed to be used as the primary outcome measurement in the IHC project’s randomized trials,  
37 but also to provide a flexible measurement tool for others interested in mapping or evaluation of  
38 people’s ability to apply Key Concepts when assessing claims about treatment effects. Instead of a “set”  
39 instrument, the Claim Evaluation Tools offers the potential to tailor an instrument for specific purposes  
40 and target groups. This is useful also for others, as the Key Concepts covered in interventions may vary.  
41 This flexibility avoids forcing end-users to respond to unnecessary questions addressing concepts that  
42 have not been covered in their interventions. The Claim Evaluations Tools will be made available on  
43 request through the website [testingtreatments.org](http://testingtreatments.org). We envision that educators, researchers and others  
44  
45  
46  
47  
48  
49  
50  
51  
52  
53  
54  
55  
56  
57  
58  
59  
60

1  
2  
3 will use them to create their own “tests”, fitting their specific needs and contexts. The Claim Evaluation  
4  
5 Tools also appear to be unique in that the items have been developed to be used to assess ability in  
6  
7 both children and adults, including members of the public as well as health professionals. This offers the  
8  
9 opportunity to compare knowledge and application of the Key Resources across populations.

10  
11  
12 The Claim Evaluation Tools were developed as objective multiple-choice items to measure  
13  
14 understanding of the Key Concepts. A limitation of many of the instruments that have been developed  
15  
16 to assess people’s critical-appraisal skills is that they rely on self-report by respondents (subjective  
17  
18 measurements). Typical examples are the many health literacy instruments, such as the European  
19  
20 Health Literacy Survey (HLS-EU)(30) and instruments used to assess competence in evidence-based  
21  
22 medicine (31). Self-assessed abilities can be difficult to interpret, and have been found to have a weak  
23  
24 association with objective measures of knowledge and skills (32-34). Such instruments may be more  
25  
26 likely to measure the confidence of respondents in their own ability rather than their knowledge or  
27  
28 actual ability. Although improved confidence in one’s own ability may be a relevant and important effect  
29  
30 of an intervention, it may be a poor indicator of actual knowledge and ability.

## 31 **Conclusion**

32  
33 We developed the Claim Evaluation Tools to evaluate people’s ability to assess claims about the effects  
34  
35 of treatments. As far as we are aware, this is currently the only evaluation instrument designed to  
36  
37 address most of the Key Concepts we believe people need to know to assess claims about treatment  
38  
39 effects. This work is the result of a multidisciplinary, international collaboration including high and low-  
40  
41 income countries. We have used a pragmatic and iterative approach, involving feedback from experts  
42  
43 and end-users, and continuous revisions. Although the Claim Evaluation Tools have been developed  
44  
45 primarily to be used as part of the IHC project in Uganda, we believe they should be useful for others  
46  
47 interested in evaluating people’s ability to apply Key Concepts when assessing treatment claims.  
48  
49 Feedback from experts and end-users in Uganda, Kenya, Rwanda, Norway, UK and Australia supports  
50  
51 our hope that they will be found relevant in other contexts.

52  
53 The Claim Evaluation Tools includes a battery of items from which researchers can select those relevant  
54  
55 for specific populations or purposes, and currently includes approximately 190 multiple-choice items.  
56  
57 However, we anticipate that the Claim Evaluation Tools will continue to evolve. The Claim Evaluation  
58  
59  
60

1  
2  
3 Tools will be hosted on the [Testing Treatments interactive website \(www.testingtreatments.org\)](http://www.testingtreatments.org) and  
4 managed by the Claim Evaluation Tools working group. On request, all items will be made freely  
5 available for non-commercial use.  
6  
7  
8  
9

### 10 11 **Authors' Contributions**

12 AA, ØG, AO wrote the protocol and the IHC group provided comments on the protocol. AA coordinated  
13 all of the development and evaluation process with support from AO. AA, DS, AN, IC, AO and MO drafted  
14 the items with input from the IHC group. AA, IC and AO were responsible for revising the items  
15 iteratively, based on the feedback received through the different processes. SR and AA were responsible  
16 for the format designs. AA and KO approached the IHC advisory group and other methodologists for  
17 feedback. AN, DS, LC, AA, MO, SR, TH and MK conducted the interviews with end-users. AN, DS, KO, LAM,  
18 MM, LAM, MK, NS, AMU and AA were involved in pilots and administrative tests in Uganda, Kenya,  
19 Rwanda and Norway respectively. AA analysed the data from the pilots. AA authored this manuscript  
20 with significant input from the rest of the IHC group.  
21  
22  
23  
24  
25  
26  
27  
28  
29  
30

### 31 **Acknowledgements**

32 We are deeply grateful to all of the enthusiastic children, parents and teachers who contributed to this  
33 project. We would also like to thank the IHC advisory panel, and other experts who provided their advice.  
34 In particular we would like to thank Sophie Robinson, Ruth Davis, Andrew Garratt, Chris Del Mar, Susan  
35 Munabi Babigumira, Jenny Moberg, Signe Agnes Flottorp, Simon Goudie, Esme Lynch and Gunn Vist.  
36  
37  
38  
39  
40  
41

### 42 **Funding and competing interests**

43 The IHC project is funded in part by the Research Council of Norway-GLOBVAC project 220603. The  
44 authors declare no conflicts of interests.  
45  
46  
47  
48

### 49 **Ethical approval**

50 Ethical approval was sought by the IHC project representatives in each country.  
51  
52  
53  
54

### 55 **Data sharing statement**



All data are published as part of this study. All Claim Evaluation Tools are available upon request for non-commercial use.

## References

1. Lewis M, Orrock P, Myers S. Uncritical reverence in CM reporting: Assessing the scientific quality of Australian news media reports. *Health Sociology Review*. 2010;19(1):57-72.
2. Glenton C, Paulsen E, Oxman A. Portals to Wonderland? Health portals lead confusing information about the effects of health care. *BMC Medical Informatics and Decision Making*. 2005;5:7:8.
3. Moynihan R, Bero L, Ross-Degnan D, Henry D, Lee K, Watkins J, et al. Coverage by the news media of the benefits and risks of medications. *The New England Journal of Medicine*. 2000;342(22):1645-50.
4. Wolfe R, Sharp L, Lipsky M. Content and design attributes of antivaccination web sites. *Journal of American Medical Association*. 2002;287(24):3245-48.
5. Woloshin S, Schwartz L, Byram S, Sox H, Fischhoff B, Welch H. Women's understanding of the mammography screening debate. *Archives of Internal Medicine* 2000;160:1434-40.
6. Fox S, Duggan M. Health Online 2013 2013 09.04.2013. Available from: <http://www.pewinternet.org/Reports/2013/Health-online.aspx>.
7. Robinson E, Kerr C, Stevens A, Lilford R, Braunholtz D, Edwards S, et al. Lay public's understanding of equipoise and randomisation in randomised controlled trials. Research Support, Non-U.S. Gov't. NHS R&D HTA Programme, 2005 Mar. Report No.: 1366-5278 (Linking) Contract No.: 8.
8. Sillence E, Briggs P, Harris PR, Fishwick L. How do patients evaluate and make use of online health information? *Social Science & Medicine*. 2007;64(9):1853-62.
9. Horsley T, Hyde C, Santesso N, Parkes J, Milne R, Stewart R. Teaching critical appraisal skills in healthcare settings. *Cochrane Database of Systematic Reviews*. 2011(11).
10. Stacey D, Bennett CL, Barry MJ, Col NF, Eden KB, Holmes-Rovner M, et al. Decision aids for people facing health treatment or screening decisions. *Cochrane Database of Systematic Reviews*. 2011(10).
11. Evans I, Thornton H, Chalmers I, P. G. *Testing Treatments: better research for better healthcare*. Second edition. London: Pinter & Martin Ltd 2011. Available from: Available online at [www.testingtreatments.org/new-edition/](http://www.testingtreatments.org/new-edition/).
12. Chalmers I., Glasziou P., Badenoch D., Atkinson P., Austvoll-Dahlgren A., Oxman A. Evidence Live 2016: Promoting informed healthcare choices by helping people assess treatment claims. *BMJ*; 26.06.2016.
13. Nsangi A., Semakula D., Oxman M., Austvoll-Dahlgren A., Rosenbaum S., Kaseje M., et al. Evaluation of resources to teach children in low income countries to assess claims about treatment effects. Protocol for a randomized trial. Submitted manuscript. 2016.
14. Semakula D., Nsangi A., Oxman M., Austvoll-Dahlgren A., Rosenbaum S., Kaseje M., et al. Can an educational podcast improve the ability of parents of primary school children to assess claims about the benefits and harms of treatments? Protocol for a randomized trial Submitted manuscript. 2016.
15. Austvoll-Dahlgren A, Oxman AD, Chalmers I, Nsangi A, Glenton C, Lewin S, et al. Key concepts that people need to understand to assess claims about treatment effects. *Journal of Evidence-Based Medicine*. 2015;8(3):112-25.

16. Austvoll-Dahlgren A, Nsangi A, Semakula D. Key concepts people need to understand to assess claims about treatment effects: a systematic mapping review of interventions and evaluation tools. Submitted paper. 2016.
17. Case SC, DB S. Constructing Written Test Questions For the Basic and Clinical Sciences (Third edition). Philadelphia, USA: 2002.
18. Williamson PR, Altman DG, Blazeby JM, Clarke M, Devane D, Gargon E, et al. Developing core outcome sets for clinical trials: issues to consider. *Trials*. 2012;13.
19. Cooney RM, Warren BF, Altman DG, Abreu MT, Travis SPL. Outcome measurement in clinical trials for Ulcerative Colitis: towards standardisation. *Trials*. 2007;8.
20. Tugwell P, Boers M, Brooks P, Simon L, Strand V, Idzerda L. OMERACT: An international initiative to improve outcome measurement in rheumatology. *Trials*. 2007;8.
21. Basch E, Aronson N, Berg A, Flum D, Gabriel S, Goodman S, et al. Methodological Standards and Patient-Centeredness in Comparative Effectiveness Research The PCORI Perspective. *Journal of the American Medical Association*. 2012;307(15):1636-40.
22. Watt T, Rasmussen AK, Groenvold M, Bjorner JB, Watt SH, Bonnema SJ, et al. Improving a newly developed patient-reported outcome for thyroid patients, using cognitive interviewing. *Qual Life Res*. 2008;17(7):1009-17.
23. McColl E, Meadows K, Barofsky I. Cognitive aspects of survey methodology and quality of life assessment. *Qual Life Res*. 2003;12(3):217-8.
24. Bloem EF, van Zuuren FJ, Koeneman MA, Rapkin BD, Visser MR, Koning CC, et al. Clarifying quality of life assessment: do theoretical models capture the underlying cognitive processes? *Qual Life Res*. 2008;17(8):1093-102.
25. Austvoll-Dahlgren A, Guttersrud G, Nsangi A, Semakula D, Oxman A, group. TI. Measuring ability to assess claims about treatment effects: A latent trait analysis of the "Claim Evaluation Tools" using Rasch modelling. Submitted paper. 2016.
26. Mokkink LB, Terwee CB, Patrick DL, Alonso J, Stratford PW, Knol DL, et al. The COSMIN checklist for assessing the methodological quality of studies on measurement properties of health status measurement instruments: an international Delphi study. *Qual Life Res*. 2010;19(4):539-49.
27. Ramos KD, Schafer S, Tracz SM. Validation of the Fresno test of competence in evidence based medicine. *BMJ*. 2003;326(7384):319-21.
28. Godwin M, Seguin R. Critical appraisal skills of family physicians in Ontario, Canada. *BMC Med Educ*. 2003;3:10.
29. O'Connor AM. Validation of a decisional conflict scale. *Med Decis Making*. 1995;15(1):25-30.
30. Sorensen K, Pelikan JM, Rothlin F, Ganahl K, Slonska Z, Doyle G, et al. Health literacy in Europe: comparative results of the European health literacy survey (HLS-EU). *Eur J Public Health*. 2015;25(6):1053-8.
31. Shaneyfelt T, Baum KD, Bell D, Feldstein D, Houston TK, Kaatz S, et al. Instruments for evaluating education in evidence-based practice: a systematic review. *JAMA*. 2006;296(9):1116-27.
32. Dahm P, Poolman RW, Bhandari M, Fesperman SF, Baum J, Kosiak B, et al. Perceptions and competence in evidence-based medicine: a survey of the American Urological Association Membership. *J Urol*. 2009;181(2):767-77.
33. Khan KS, Awonuga AO, Dwarakanath LS, Taylor R. Assessments in evidence-based medicine workshops: loose connection between perception of knowledge and its objective assessment. *Med Teach*. 2001;23(1):92-4.
34. Joffe S, Cook EF, Cleary PD, Clark JW, Weeks JC. Quality of informed consent in cancer clinical trials: a cross-sectional survey. *Lancet*. 2001;358(9295):1772-7.

1  
2  
3  
4  
5  
6  
7 **Figure legends**  
8

9 *Figure 1. Overview and timeline of the development process*  
10

11 *Figure 2. Example of formats*  
12

13 *Figure 3. Examples of incorrectly completed multiple-choice questions*  
14

15 *Figure 4. Distribution of correct answers in pilots*  
16  
17  
18  
19  
20  
21  
22  
23  
24  
25  
26  
27  
28  
29  
30  
31  
32  
33  
34  
35  
36  
37  
38  
39  
40  
41  
42  
43  
44  
45  
46  
47  
48  
49  
50  
51  
52  
53  
54  
55  
56  
57  
58  
59  
60

For peer review only

1  
2  
3  
4  
5  
6  
7  
8  
9  
10  
11  
12  
13  
14  
15  
16  
17  
18  
19  
20  
21  
22  
23  
24  
25  
26  
27  
28  
29  
30  
31  
32  
33  
34  
35  
36  
37  
38  
39  
40  
41  
42  
43  
44  
45  
46  
47  
48  
49  
50  
51  
52  
53  
54  
55  
56  
57  
58  
59  
60

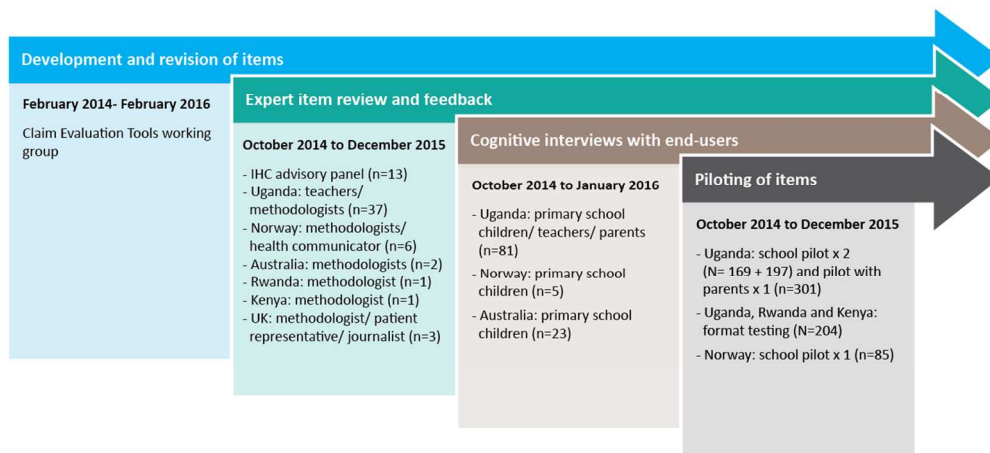

Figure 1

173x78mm (300 x 300 DPI)

er review only

## Concept 1.3

Judith wants smoother skin. The younger girls in her school have smoother skin than the older girls. Judith thinks this is because the younger girls use cream on their skin to make the skin smoother.

**Question:** Based on this link between using cream and smooth skin, is Judith correct?

**Options:**

- A) It is not possible to say. It depends on how many younger and older girls there are
- B) It is not possible to say. There might be other differences between the younger and older girls
- C) Yes, because the younger girls use cream on their skin and they have smoother skin
- D) No, Judith should try using the cream herself to see if it works for her

**Answer:**

|          |                                                                                                                                                                                                                            |              |                 |
|----------|----------------------------------------------------------------------------------------------------------------------------------------------------------------------------------------------------------------------------|--------------|-----------------|
| Concepts | When you are sick, sometimes people say that something - a <u>treatment</u> - is good for you. It is hard to know whether what they say is true.<br><b>Do you agree or disagree with each of the following statements?</b> |              |                 |
|          | <i>For each statement below, use ✓ to mark whether you agree or disagree.</i>                                                                                                                                              |              |                 |
|          | <b>Statements:</b>                                                                                                                                                                                                         | <b>Agree</b> | <b>Disagree</b> |
| 1.1      | James says that a treatment cannot be helpful and harmful at the same time                                                                                                                                                 |              |                 |
| 1.2      | Peter says that if a treatment works for one person, the treatment will help others too                                                                                                                                    |              |                 |
| 1.3      | Alice says that if some people try the treatment and feel better, this means that the treatment helps                                                                                                                      |              |                 |

173x199mm (300 x 300 DPI)

1  
2  
3  
4  
5  
6  
7  
8  
9  
10  
11  
12  
13  
14  
15  
16  
17  
18  
19  
20  
21  
22  
23  
24  
25  
26  
27  
28  
29  
30  
31  
32  
33  
34  
35  
36  
37  
38  
39  
40  
41  
42  
43  
44  
45  
46  
47  
48  
49  
50  
51  
52  
53  
54  
55  
56  
57  
58  
59  
60

George has a stomachache. The last time George had a stomachache was two months ago. That time, he drank some hot milk and after an hour, his stomachache was gone. Therefore, George says hot milk cures stomachaches.

**QUESTION:**

Is George right?

PLEASE CIRCLE THE ANSWER THAT YOU THINK IS THE BEST

- A. No, it is only based on George's own experience treating a stomachache with hot milk.
- B. Not possible to say, the fact that he improved could have happened by chance.
- C. Yes, George's own experience is evidence enough for assessing the effects of hot milk for treating a stomachache.
- D. No, it is important to ask what other people think too, not just George.

Outside the city where Paul lives, there is a mine. The miners often get coughs. For many years, most of the miners have used whiskey mixed in water to reduce the pain from their coughs. Therefore, Paul says that water with a little whiskey is an effective and harmless treatment for a cough, since many people have used it for a long time.

**QUESTION:**

Do you agree with Paul?

PLEASE CIRCLE THE ANSWER THAT YOU THINK IS THE BEST

- A. No, just because whiskey mixed in water has been used by many, does not mean that it is harmless.
- B. No, just because whiskey mixed in water have been used a lot, does not mean that it is the best treatment.
- C. Yes, the miners have used whiskey mixed in water to treat their coughs for many years and they would not use the treatment for many years if it were not beneficial and harmless.
- D. Not possible to say, Paul should try whiskey mixed in water on himself to know for sure that he is correct.

Andrew has difficulty breathing. He goes to the shop to buy medicine. The shopkeeper gives Andrew tablet and says it will help improve his breathing. Andrew thinks if taking one tablet will help him, then taking two tablets will help him even more. Should Andrew take one or two tablets? Mark an X in the box for the best answer (only one)

- One. Taking two is likely to be harmful and more expensive
- One. Taking more than one will not necessarily be more helpful and may be harmful
- One. Andrew should listen to the shopkeeper's advice
- Two. Taking more than one will probably help him get better more quickly and is unlikely to be harmful

82x215mm (300 x 300 DPI)

1  
2  
3  
4  
5  
6  
7  
8  
9  
10  
11  
12  
13  
14  
15  
16  
17  
18  
19  
20  
21  
22  
23  
24  
25  
26  
27  
28  
29  
30  
31  
32  
33  
34  
35  
36  
37  
38  
39  
40  
41  
42  
43  
44  
45  
46  
47  
48  
49  
50  
51  
52  
53  
54  
55  
56  
57  
58  
59  
60

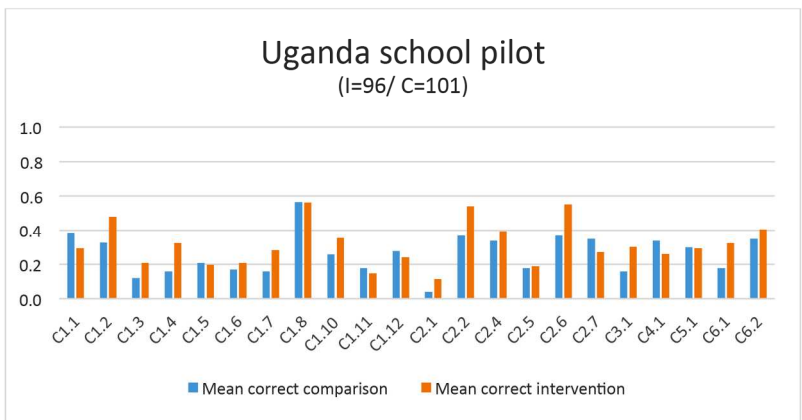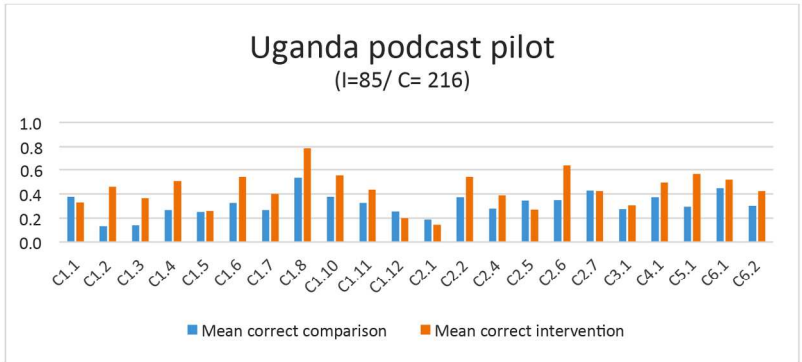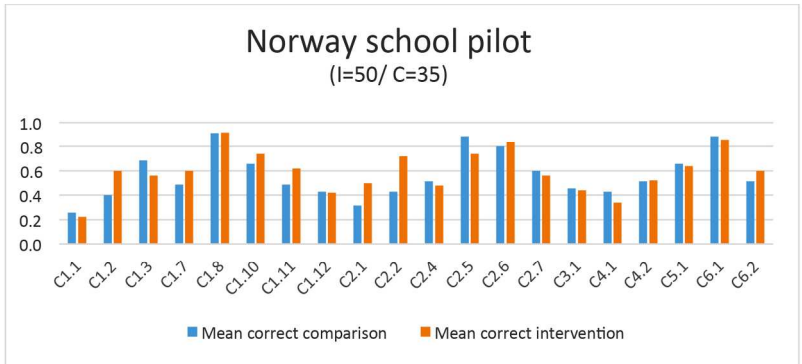

148x215mm (300 x 300 DPI)

## Example interview guide version 1

1. Introductions and information about purpose  
(The purpose of the interview is not to evaluate how participants perform on the questions, but to get feedback on the questions, i.e. comprehension and relevance)
2. Steps of reasoning (per item)
  - What was your response?
  - Can you tell me why you choose this response category? (steps of reasoning)
3. Relevance (per item)
  - What did you think of the scenario?
    - Probe:
      - Names
      - Treatment
      - Outcome
      - Other comments



## Example interview guide version 2

### Content and format

1. Introductions and information about purpose  
(The purpose of the interview is not to evaluate how participants perform on the questions, but to get feedback on the questions, i.e. comprehension and relevance)
4. Tell me about the test, what did you think about it?
  - First impression?
  - Similarities to other tests or exams?
  - Like/ doesn't like these differences?
5. What did you think about the instructions?
  - The test include different formats (show examples of SMC's and MMC's), what did you think of them?
  - The test also included some questions about behavior and attitudes, what did you think of them?
  - Do you think these questions fit your age group?
  - Was there any information you felt was missing?
6. What about the content of the test, was it easy or not easy for you to answer the questions?
  - What made it easy or not easy?
  - Were there any words you did not understand or otherwise reacted to?

### Literacy / understanding of the multiple-choice items

7. Ask the respondent to read question 3 (concept 1.2) and question 14 (concept 2.2) from the Claim Evaluations Tools questionnaire that was used.
  - Was it easy or hard to understand that question?
  - What words were hard to understand?
  - What do you think the right answer is?
  - Why?
  - After explaining any words that they did not understand and helping them to read the question and response options, ask them what they think the right answer is.
