# Supplementary material for: Measuring ability to assess claims about treatment effects: the development of the ‘Claim Evaluation Tools’
Source: PubMed Central journal article supplement — BMJ Open. 2017 May 17;7(5):e013184. doi: 10.1136/bmjopen-2016-013184 (PMC5777467; doi:10.1136/bmjopen-2016-013184), 2017-05-17
Supplement: bmjopen-2016-013184supp001.pdf [file bmjopen-2016-013184supp001.pdf]

## Example interview guide version 1

1. Introductions and information about purpose  
(The purpose of the interview is not to evaluate how participants perform on the questions, but to get feedback on the questions, i.e. comprehension and relevance)
  
2. Steps of reasoning (per item)
  - What was your response?
  - Can you tell me why you choose this response category? (steps of reasoning)
  
3. Relevance (per item)
  - What did you think of the scenario?
    - Probe:
      - Names
      - Treatment
      - Outcome
      - Other comments

## Example interview guide version 2

### Content and format

1. Introductions and information about purpose  
(The purpose of the interview is not to evaluate how participants perform on the questions, but to get feedback on the questions, i.e. comprehension and relevance)
  
4. Tell me about the test, what did you think about it?
  - First impression?
  - Similarities to other tests or exams?
  - Like/ doesn't like these differences?
  
5. What did you think about the instructions?
  - The test include different formats (show examples of SMC's and MMC's), what did you think of them?
  - The test also included some questions about behavior and attitudes, what did you think of them?
  - Do you think these questions fit your age group?
  - Was there any information you felt was missing?
  
6. What about the content of the test, was it easy or not easy for you to answer the questions?
  - What made it easy or not easy?
  - Were there any words you did not understand or otherwise reacted to?

### Literacy / understanding of the multiple-choice items

7. Ask the respondent to read question 3 (concept 1.2) and question 14 (concept 2.2) from the Claim Evaluations Tools questionnaire that was used.
  - Was it easy or hard to understand that question?
  - What words were hard to understand?
  - What do you think the right answer is?
  - Why?
  - After explaining any words that they did not understand and helping them to read the question and response options, ask them what they think the right answer is.
